# Supplementary material for: Tetrasubstituted Pyrrole Derivative Mimetics of Protein–Protein Interaction Hot-Spot Residues: A Promising Class of Anticancer Agents Targeting Melanoma Cells
Source: MDPI journal article supplement (doi:10.3390/molecules28104161), 2023-05-18
Supplement: s1 [file s1]

# Supporting Information

## Tetrasubstituted pyrrole derivatives mimetics of protein-protein interaction hot spot residues: a promising class of anticancer agents targeting melanoma cells

Marco Persico <sup>1#</sup>, Paola Galatello <sup>2#</sup>, Maria Grazia Ferraro <sup>1</sup>, Carlo Irace <sup>1</sup>, Avazbek Abduvakhidov <sup>1</sup>, Oleh Tkachuk <sup>1</sup>, Maria Luisa d'Aulisio Garigliota <sup>2</sup>, Marialuisa Piccolo <sup>1</sup>, Pietro Campiglia <sup>2</sup>, Patrizia Iannece <sup>3</sup>, Varra Michela <sup>1\*</sup>, Anna Ramunno <sup>2\*</sup> and Caterina Fattorusso <sup>1\*</sup>

### TABLE OF CONTENT

|                |                                                                                                                                                                                                                        |       |
|----------------|------------------------------------------------------------------------------------------------------------------------------------------------------------------------------------------------------------------------|-------|
| Figure S1      | Graphical representation of the absorption of PBS measured at 640 vs $\mu$ L of added DMSO solutions                                                                                                                   | 2-3   |
| Figure S2      | Antiproliferative activity during bioscreen in vitro                                                                                                                                                                   | 4     |
| Figure S3      | Comparison of the conformational enantiomers of the global minimum conformers of compound <b>10a</b>                                                                                                                   | 5     |
| Figure S4      | Conformers of TSP conformational families of 10a, 9g and 10b                                                                                                                                                           | 6     |
| Figure S5      | Superimposition between the PM6 and the DFT TCC and TCT lowest energy conformer of <b>1</b>                                                                                                                            | 7     |
| Figure S6      | Sequence alignment between the human p14 <sup>ARF</sup> and the mouse p19 <sup>ARF</sup> tumor suppressor protein                                                                                                      | 8     |
| Tables S1-S12  | $\Delta E_{GM}$ values (kcal/mol), torsional angle values (degrees) and occurrence rates (%) of conformational families considering MM conformers within 5 kcal/mol from the global minimum                            | 9-20  |
| Tables S13-S23 | Conformational energy, structural classification, and intramolecular distances ( $\text{\AA}$ ) of calculated DFT conformers                                                                                           | 21-31 |
| Table S24      | TSP conformers grouped according to the intramolecular distances between the X, Y, and Z rings.                                                                                                                        | 32    |
| Table S25      | Distances between the centroids of the side chains of the hot-spot residues of the considered PPI motifs.                                                                                                              | 33    |
| Table S26      | Calculated RMSD ( $\text{\AA}$ ) by fitting the centroids of the aromatic rings X, Y, and Z of the selected DFT conformers on the centroids of the side chains of the considered PPI motif                             | 34    |
| Table S27      | Calculated RMSD ( $\text{\AA}$ ) by fitting the centroids of the aromatic rings X, Y, and Z of the selected DFT conformers on the centroids of the side chains of the considered PPI motif on human p14 <sup>ARF</sup> | 35    |
| Table S28      | cLogD <sub>7.4</sub> of compounds <b>1</b> , <b>9a-i</b> , and <b>10a-b</b>                                                                                                                                            | 36    |
| Scheme S1      | Synthesis of diketone derivatives <b>5b,c</b>                                                                                                                                                                          | 37    |
|                | NMR Spectra of <b>9a-i</b> , <b>10a</b> , <b><math>\pm</math>10b</b>                                                                                                                                                   | 38-48 |

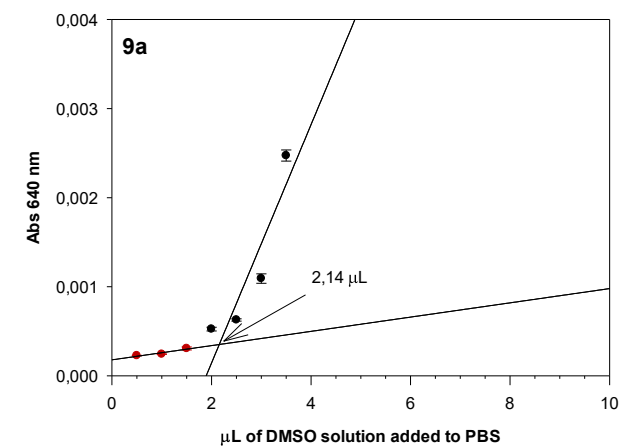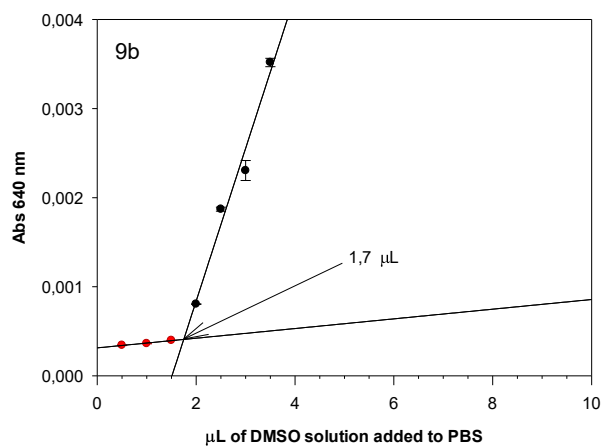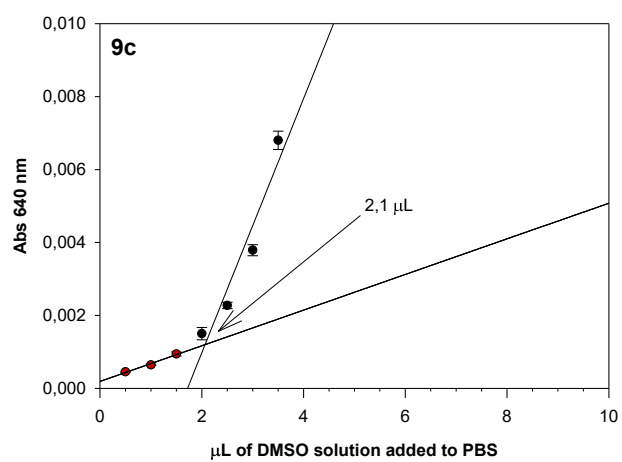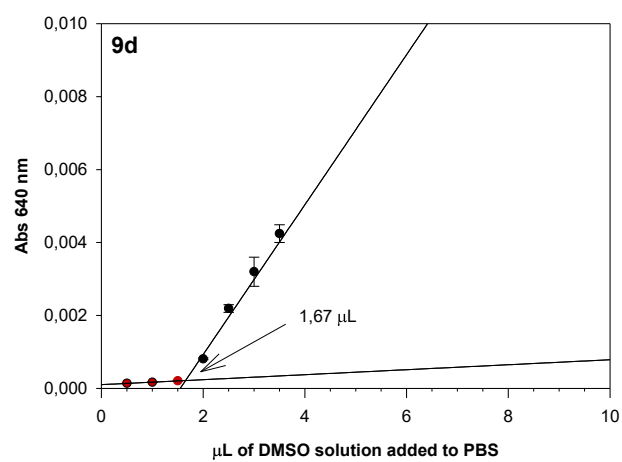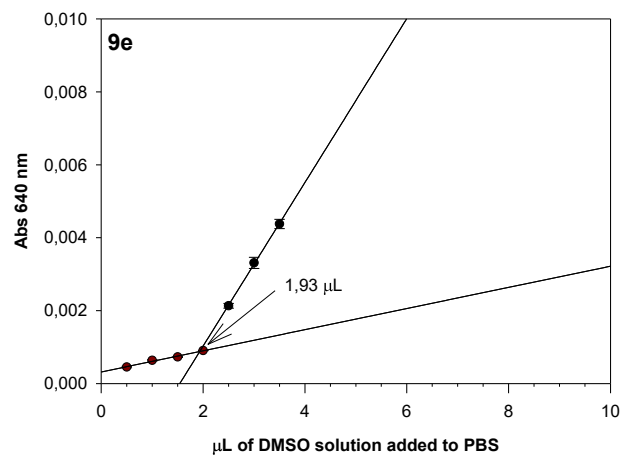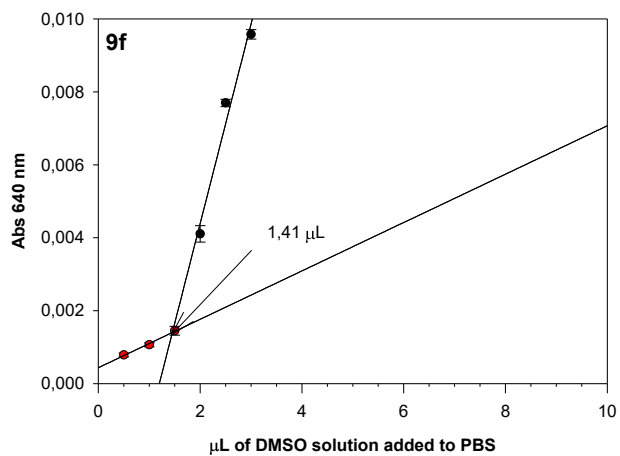

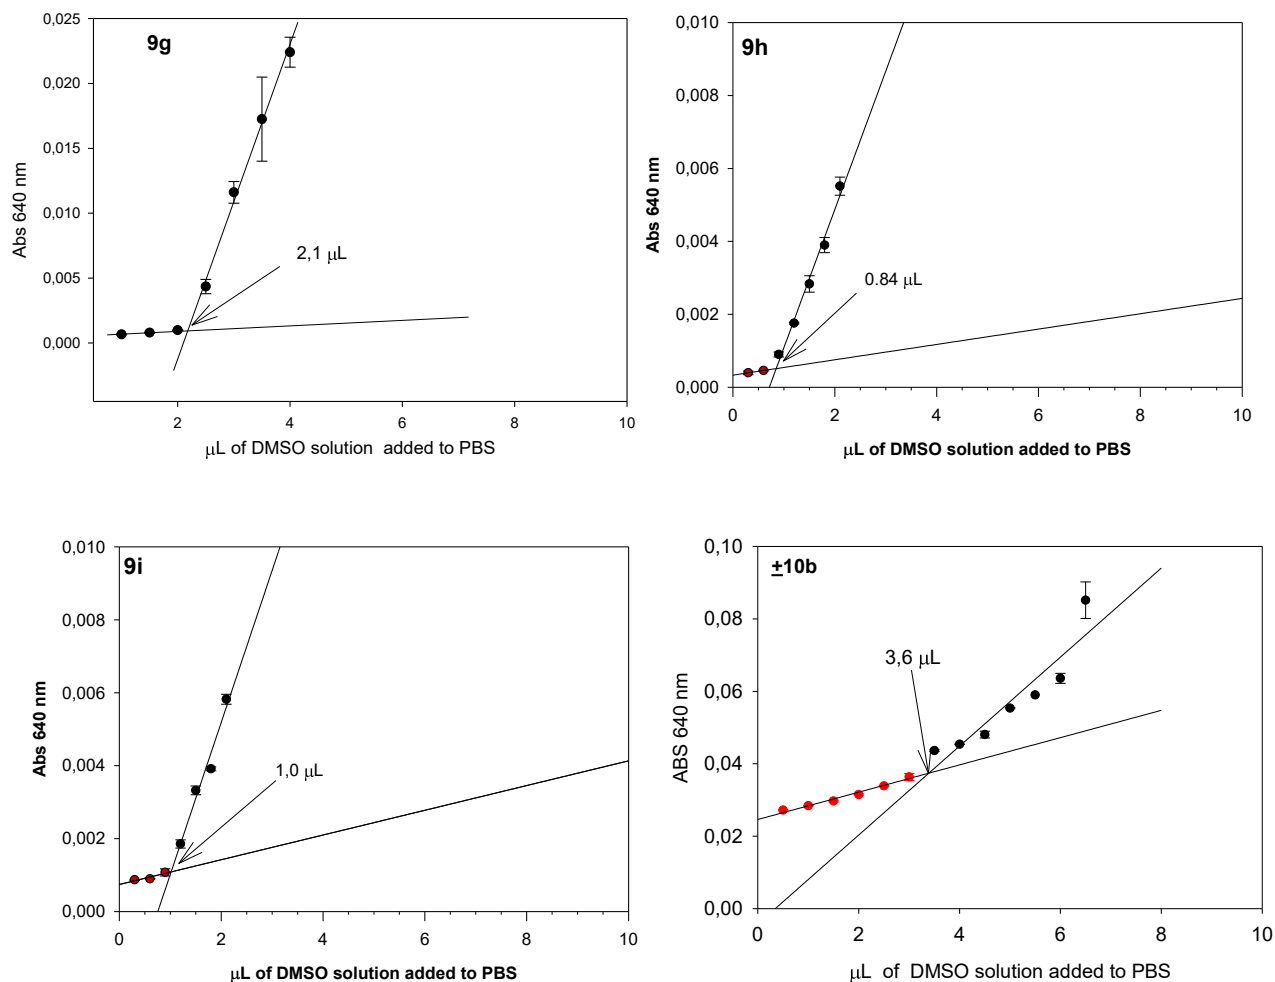

**Figure S1.** Graphical representation of the absorption of PBS measured at 640 vs  $\mu\text{L}$  of added DMSO solutions containing the species indicated in each panel. DMSO solutions (2,6 mM, for **9a**, **9b**, **9c**, **9d**, **9e**, **9f**,  $\pm 10\text{b}$  or 1,0 mM for **9g**, **9h**, **9i**) were added to 1400  $\mu\text{L}$  of PBS 0.5 at time. In all cases the final % (Vol/Vol) of DMSO in PBS was  $\leq 0.6\%$

(A)

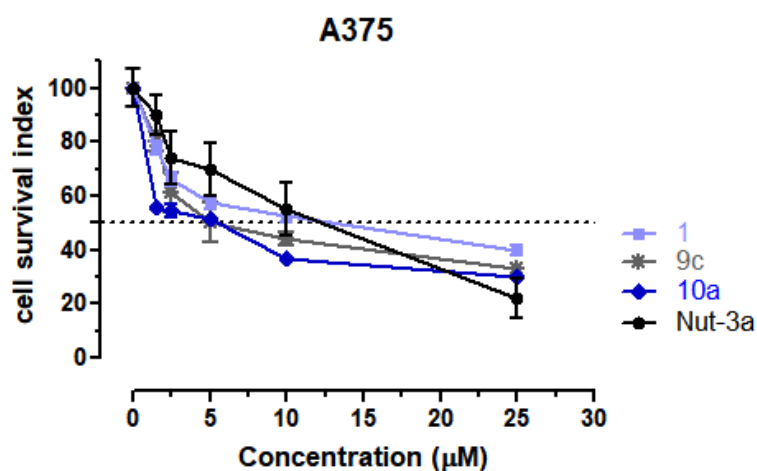

(B)

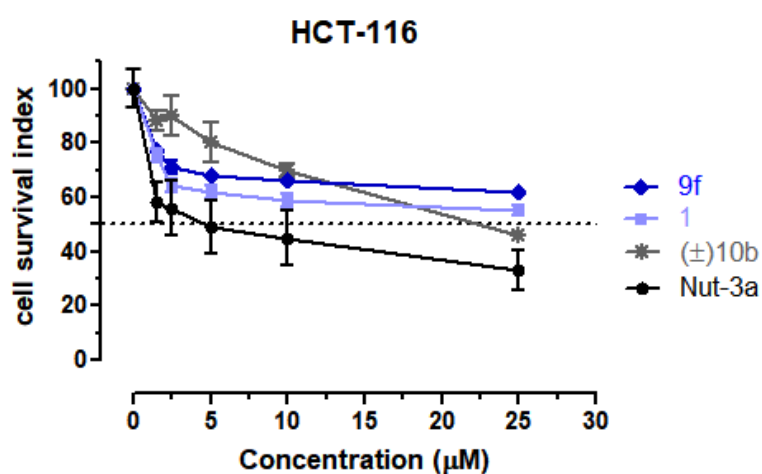

**Figure S2. Antiproliferative activity during bioscreen *in vitro*.** Cell survival index, evaluated by the MTT assay and the estimation of live/dead cell ratio, following 48 h of incubation with the indicated concentrations (the range 1→25  $\mu\text{M}$  has been explored) of compounds **1**, **9c**, and **10a** for A375 cells (**A**), and of compounds **9f**, **1** and ( $\pm$ )**10b** for HCT-116 cells (**B**), respectively, as indicated in the legends. Nutlin-3a (**Nut-3a**) was used as positive control for cytotoxic and antiproliferative effects. Data are expressed as percentage of untreated control cells and are reported as mean of five independent experiments  $\pm$  SEM ( $n = 30$ ).

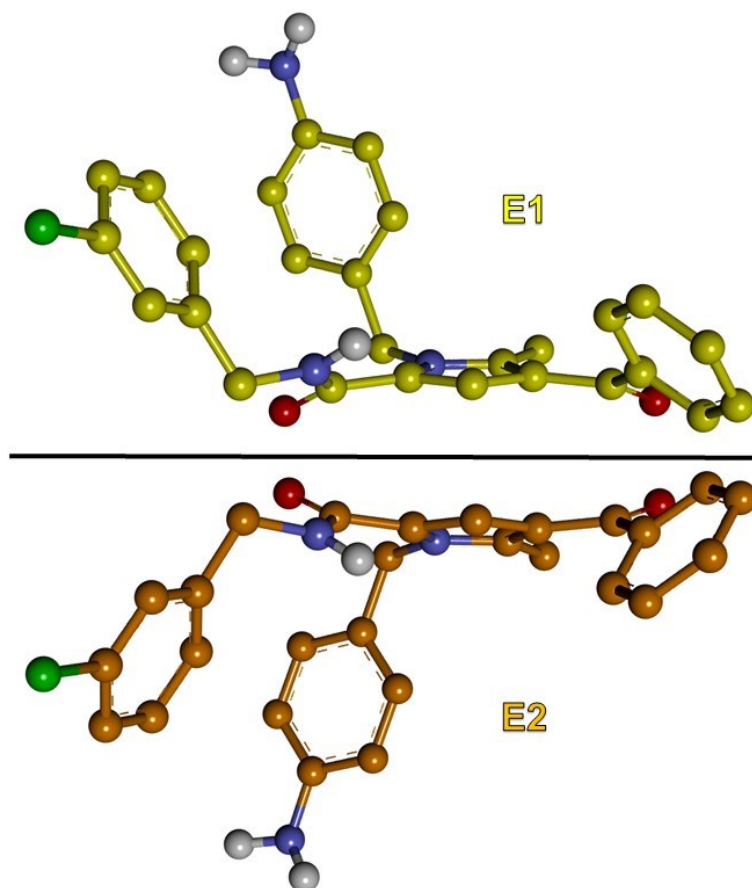

**Figure S3.** Comparison of the conformational enantiomers of the global minimum conformer of compound **10a**. Structures are displayed as ball and sticks. Heteroatoms are colored by atom type: O, red; N, blue and Cl, light green. Hydrogens are omitted for clarity with the exception of those bonded to the amide and amine nitrogen.

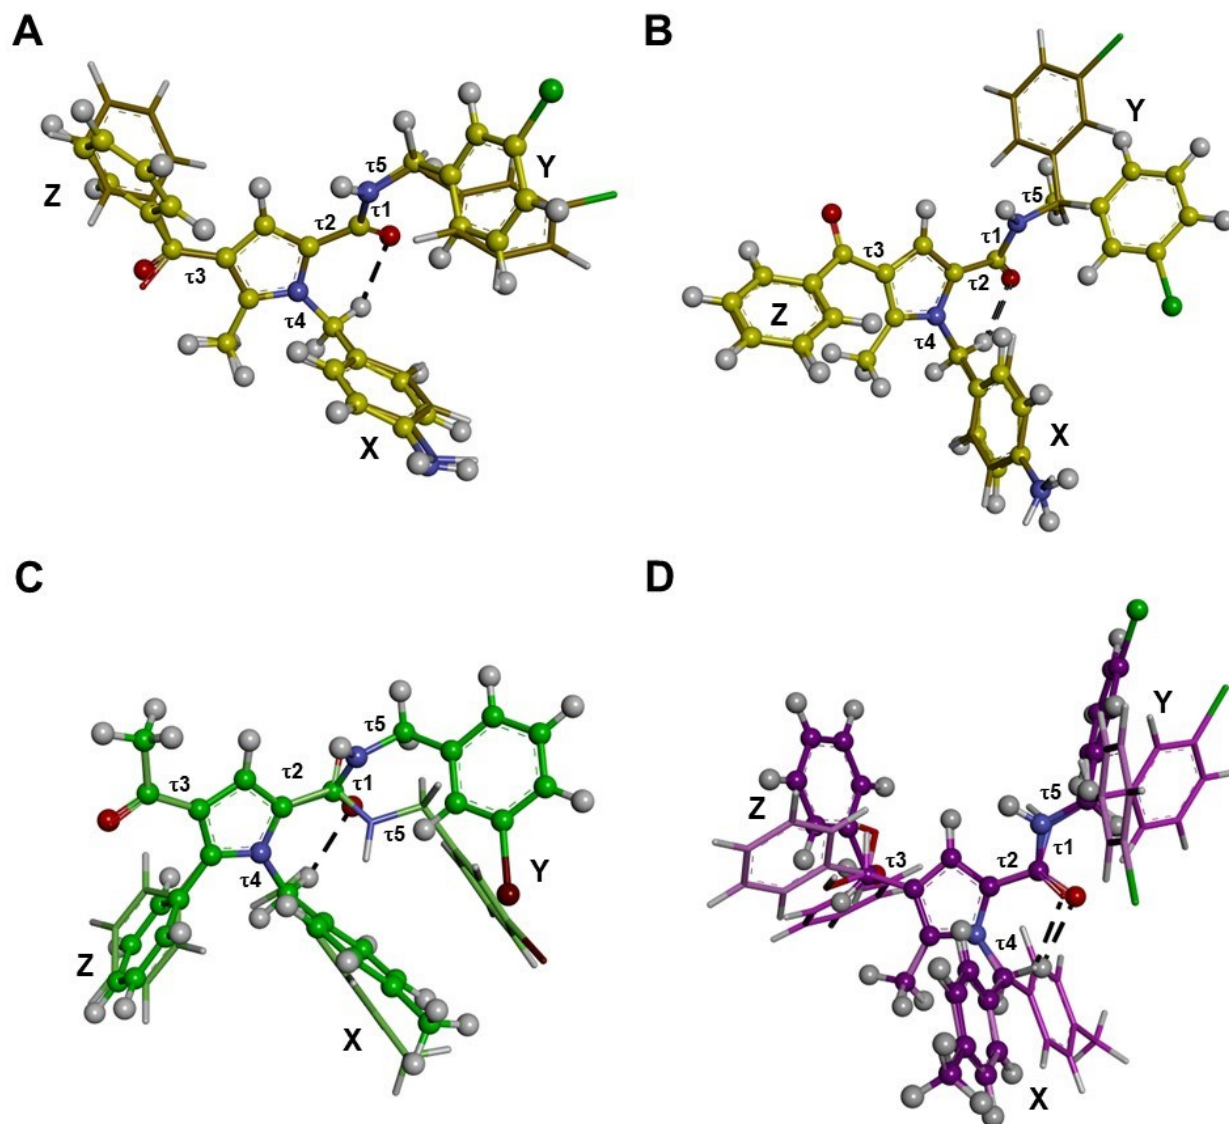

**Figure S4.** TSP conformers: TCC I (yellow) and TCC II (dark yellow) (**10a**; A); TCT I (yellow) and TCT III (dark yellow) (**10a**; B); TCC I (green) and TTC IV (light green) (**9g**; C); TCG<sup>-</sup> (violet), TCA<sup>-</sup> (pink) and TCG<sup>+</sup> (magenta) (**R-10b**; D). The lowest energy conformers of the family are displayed in ball&stick and the others (if any) in stick. The  $\tau_1$ - $\tau_5$  torsion angles and the pharmacophoric rings are labelled. Heteroatoms are colored by atom type: O, red; N, blue; Cl, green; Br, brown. The intra-molecular hydrogen-bond interactions are evidenced with a black dashed line.

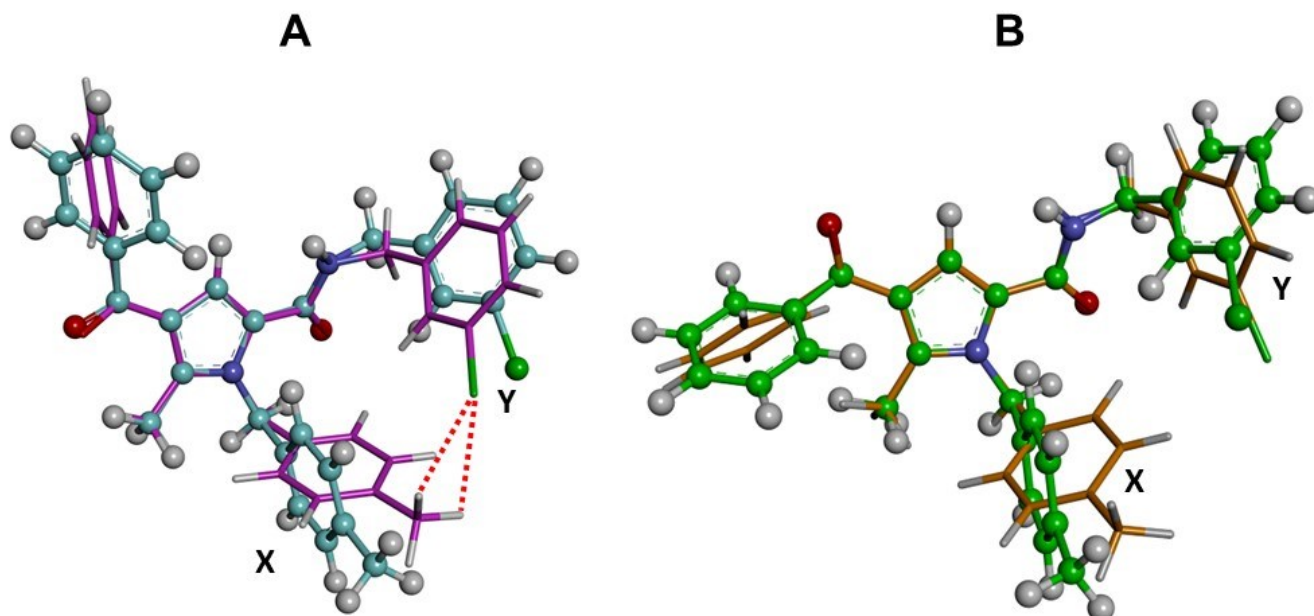

**Figure S5.** A: Comparison between the PM6 (stick and carbon atoms in magenta) and the DFT (ball&stick and carbon atoms in light blue) TCC I conformer of **1**. B: Comparison between the PM6 (stick and carbon atoms in orange) and the DFT (ball&stick and carbon atoms in green) TCT I conformer of **1**. Heteroatoms are colored by atom type: O, red; N, blue; Cl, light green. The intra-molecular hydrogen-bond interactions between methyl group and chlorine atom are evidenced with red dashed lines.

|                           |     |                                                                        |                                                       |                                     |                          |                                                                            |
|---------------------------|-----|------------------------------------------------------------------------|-------------------------------------------------------|-------------------------------------|--------------------------|----------------------------------------------------------------------------|
|                           |     |                                                                        | <b><math>\alpha</math>-helix H1</b>                   | <b><math>\alpha</math>-helix H2</b> |                          |                                                                            |
| p19 <sup>ARF</sup> _mouse | 1   | MGR                                                                    | RFLVT                                                 | VRIQ                                | RAGRLQ                   | ERVFLVKFVRSRRPRTASCALAFVNMLLRLEILRRGPHRNP-GPGDDDGQ 69                      |
| p14 <sup>ARF</sup> _human | 1   | MVR                                                                    | RFLVTL                                                | RI                                  | RRACGPPR                 | VRVFVVIIPRLTGEWAAPGAPAAVALVLMLLRSQRLGQQPLPRRPGHDDGQ 70                     |
| <u>Consensus aa:</u>      |     | <b>Ms</b>                                                              | <b>RRFLVT</b>                                         | <b>IRIP</b>                         | <b>Rat . P . p . RVF</b> | <b>IV+hsR . p . . hAstA . AhVshlL . LbR . bR . G . p . . P . . PGcDDGQ</b> |
| p19 <sup>ARF</sup> _mouse | 70  | RSRSSSSAQLRCRFELRGPHYLLPPGARRSAGRLPGHAGGAARVRGSAGCARCLGSPAARLGPRAGTSRH | 139                                                   |                                     |                          |                                                                            |
| p14 <sup>ARF</sup> _human | 71  | RPSGGAAAAPRRGAQLRRPRHSHPTRARRCPGGLPGHAGGAAPGRGAAGRARCLGPSARGPG-----    | 132                                                   |                                     |                          |                                                                            |
| <u>Consensus aa:</u>      |     | <b>RspttttA . . R . . hpLR . P+@ . hPs . ARRtsG . L</b>                | <b>PGHAGGAA . sRGtAG . ARCLGssA . . . G . . . . .</b> |                                     |                          |                                                                            |
| p19 <sup>ARF</sup> _mouse | 140 | RAIFAFRWVLFVFRWVVFYRWERRPDRA                                           | 169                                                   |                                     |                          |                                                                            |
| p14 <sup>ARF</sup> _human |     | -----                                                                  |                                                       |                                     |                          |                                                                            |
| <u>Consensus aa:</u>      |     | .....                                                                  |                                                       |                                     |                          |                                                                            |

**Figure S6.** Sequence alignment of the human p14<sup>ARF</sup> and the mouse p19<sup>ARF</sup> tumor suppressor protein. The first two N-terminal helices of p14<sup>ARF</sup> (H1 (4-15) and H2 (20-30)) involved in the interaction with MDM2 are evidenced with a red box.



**Table S1.**  $\Delta E_{\text{GM}}$  values (kcal/mol), torsional angle values (degrees) and occurrence rates (%) of conformational families of **1** considering MM conformers within 5 kcal/mol from the global minimum.

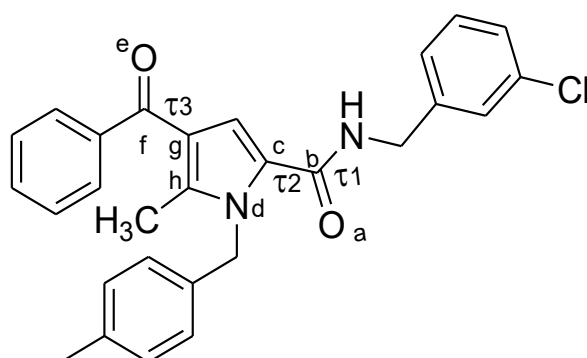

| Family | $\Delta E_{\text{GM}}^a$<br>(kcal/mol) | Torsional Angles ( $^\circ$ ) |             |             | Occurrence Rate<br>(%) |
|--------|----------------------------------------|-------------------------------|-------------|-------------|------------------------|
|        |                                        | $\tau 1^b$                    | $\tau 2^c$  | $\tau 3^d$  |                        |
| TTC    | 0.00-4.95                              | $\sim 180$                    | $\sim 180$  | $\sim 0.00$ | 24                     |
| TTT    | 0.03-4.91                              | $\sim 180$                    | $\sim 180$  | $\sim 180$  | 25                     |
| TCT    | 1.58-4.95                              | $\sim 180$                    | $\sim 0.00$ | $\sim 180$  | 25                     |
| TCC    | 2.39-4.94                              | $\sim 180$                    | $\sim 0.00$ | $\sim 0.00$ | 26                     |

<sup>a</sup>The values reported refer to the lowest and the highest energy conformers of the family. <sup>b</sup> $\tau 1$  torsional angle is calculated considering the amide bond atoms. <sup>c</sup> $\tau 2$ : a, b, c, and d atoms. <sup>d</sup> $\tau 3$ : e, f, g, and h atoms.

**Table S2.**  $\Delta E_{\text{GM}}$  values (kcal/mol), torsional angle values (degrees) and occurrence rates (%) of conformational families of **10a** considering MM conformers within 5 kcal/mol from the global minimum.

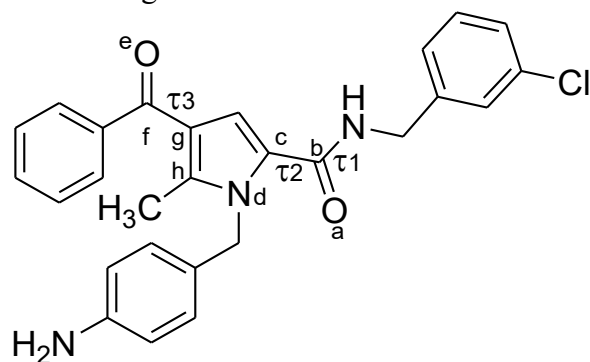

| Family | $\Delta E_{GM}^a$<br>(kcal/mol) | Torsional Angles ( $^\circ$ ) |             |             | Occurrence Rate<br>(%) |
|--------|---------------------------------|-------------------------------|-------------|-------------|------------------------|
|        |                                 | $\tau 1^b$                    | $\tau 2^c$  | $\tau 3^d$  |                        |
| TTC    | 0.00-4.97                       | $\sim 180$                    | $\sim 180$  | $\sim 0.00$ | 26                     |
| TTT    | 0.26-4.97                       | $\sim 180$                    | $\sim 180$  | $\sim 180$  | 23                     |
| TCT    | 1.90-4.87                       | $\sim 180$                    | $\sim 0.00$ | $\sim 180$  | 28                     |
| TCC    | 2.44-4.96                       | $\sim 180$                    | $\sim 0.00$ | $\sim 0.00$ | 23                     |

<sup>a</sup>The values reported refer to the lowest and the highest energy conformers of the family. <sup>b</sup>  $\tau_1$  torsional angle is calculated considering the amide bond atoms. <sup>c</sup>  $\tau_2$ : a, b, c, and d atoms. <sup>d</sup>  $\tau_3$ : e, f, g, and h atoms.

**Table S3.**  $\Delta E_{GM}$  values (kcal/mol), torsional angle values (degrees) and occurrence rates (%) of conformational families of **9a** considering MM conformers within 5 kcal/mol from the global minimum.

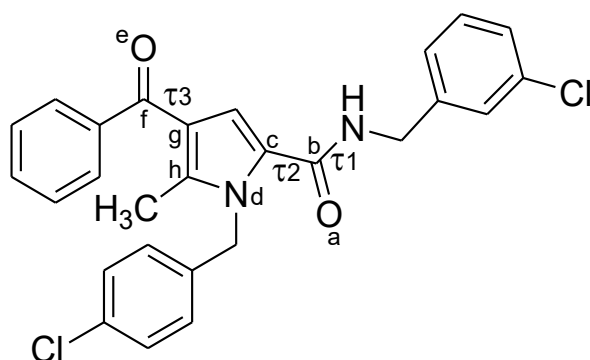

| Family | $\Delta E_{GM}^a$<br>(kcal/mol) | Torsional Angles ( $^\circ$ ) |             |             | Occurrence Rate<br>(%) |
|--------|---------------------------------|-------------------------------|-------------|-------------|------------------------|
|        |                                 | $\tau 1^b$                    | $\tau 2^c$  | $\tau 3^d$  |                        |
| TTC    | 0.00-4.88                       | $\sim 180$                    | $\sim 180$  | $\sim 0.00$ | 23                     |
| TTT    | 0.34-4.96                       | $\sim 180$                    | $\sim 180$  | $\sim 180$  | 25                     |
| TCT    | 1.96-4.89                       | $\sim 180$                    | $\sim 0.00$ | $\sim 180$  | 29                     |
| TCC    | 2.37-4.92                       | $\sim 180$                    | $\sim 0.00$ | $\sim 0.00$ | 23                     |

<sup>a</sup>The values reported refer to the lowest and the highest energy conformers of the family. <sup>b</sup>  $\tau 1$  torsional angle is calculated considering the amide bond atoms. <sup>c</sup>  $\tau 2$ : a, b, c, and d atoms. <sup>d</sup>  $\tau 3$ : e, f, g, and h atoms.

**Table S4.**  $\Delta E_{\text{GM}}$  values (kcal/mol), torsional angle values (degrees) and occurrence rates (%) of conformational families of **9b** considering MM conformers within 5 kcal/mol from the global minimum.

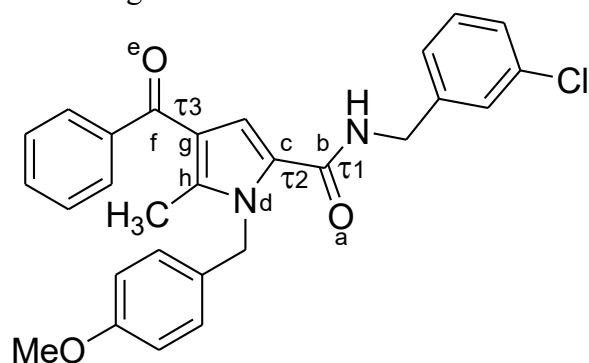

| Family | $\Delta E_{\text{GM}}^a$<br>(kcal/mol) | Torsional Angles ( $^\circ$ ) |            |            | Occurrence Rate<br>(%) |
|--------|----------------------------------------|-------------------------------|------------|------------|------------------------|
|        |                                        | $\tau 1^b$                    | $\tau 2^c$ | $\tau 3^d$ |                        |
| TTC    | 0.00-4.98                              | ~180                          | ~180       | ~0.00      | 23                     |
| TTT    | 0.45-4.98                              | ~180                          | ~180       | ~180       | 18                     |
| TCC    | 1.96-4.97                              | ~180                          | ~0.00      | ~0.00      | 34                     |
| TCT    | 2.18-4.77                              | ~180                          | ~0.00      | ~180       | 25                     |

<sup>a</sup>The values reported refer to the lowest and the highest energy conformers of the family. <sup>b</sup>  $\tau 1$  torsional angle is calculated considering the amide bond atoms. <sup>c</sup>  $\tau 2$ : a, b, c, and d atoms. <sup>d</sup>  $\tau 3$ : e, f, g, and h atoms.

**Table S5.**  $\Delta E_{\text{GM}}$  values (kcal/mol), torsional angle values (degrees) and occurrence rates (%) of conformational families of **9c** considering MM conformers within 5 kcal/mol from the global minimum.

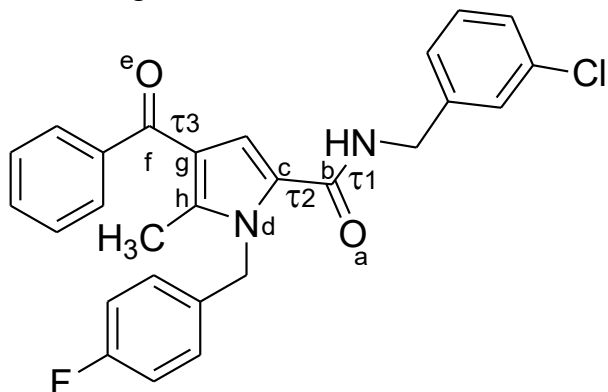

| Family | $\Delta E_{\text{GM}}^a$<br>(kcal/mol) | Torsional Angles ( $^\circ$ ) |            |            | Occurrence Rate<br>(%) |
|--------|----------------------------------------|-------------------------------|------------|------------|------------------------|
|        |                                        | $\tau 1^b$                    | $\tau 2^c$ | $\tau 3^d$ |                        |
| TTC    | 0.00-4.99                              | ~180                          | ~180       | ~0.00      | 28                     |
| TTT    | 0.38-4.97                              | ~180                          | ~180       | ~180       | 21                     |
| TCT    | 1.84-4.20                              | ~180                          | ~0.00      | ~180       | 22                     |
| TCC    | 1.89-4.68                              | ~180                          | ~0.00      | ~0.00      | 29                     |

<sup>a</sup>The values reported refer to the lowest and the highest energy conformers of the family. <sup>b</sup>  $\tau 1$  torsional angle is calculated considering the amide bond atoms. <sup>c</sup>  $\tau 2$ : a, b, c, and d atoms. <sup>d</sup>  $\tau 3$ : e, f, g, and h atoms.

**Table S6.**  $\Delta E_{GM}$  values (kcal/mol), torsional angle values (degrees) and occurrence rates (%) of conformational families of **9d** considering MM conformers within 5 kcal/mol from the global minimum.

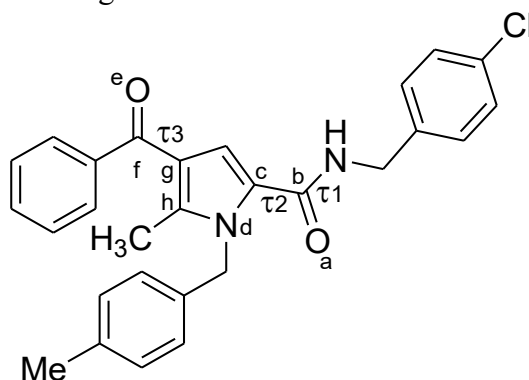

| Family | $\Delta E_{GM}^a$<br>(kcal/mol) | Torsional Angles ( $^\circ$ ) |            |            | Occurrence Rate<br>(%) |
|--------|---------------------------------|-------------------------------|------------|------------|------------------------|
|        |                                 | $\tau 1^b$                    | $\tau 2^c$ | $\tau 3^d$ |                        |
| TTC    | 0.00-4.94                       | ~180                          | ~180       | ~0.00      | 26                     |
| TTT    | 0.05-4.72                       | ~180                          | ~180       | ~180       | 24                     |
| TCT    | 1.92-4.86                       | ~180                          | ~0.00      | ~180       | 22                     |
| TCC    | 2.02-4.58                       | ~180                          | ~0.00      | ~0.00      | 28                     |

<sup>a</sup>The values reported refer to the lowest and the highest energy conformers of the family. <sup>b</sup>  $\tau 1$  torsional angle is calculated considering the amide bond atoms. <sup>c</sup>  $\tau 2$ : a, b, c, and d atoms. <sup>d</sup>  $\tau 3$ : e, f, g, and h atoms.

**Table S7.**  $\Delta E_{GM}$  values (kcal/mol), torsional angle values (degrees) and occurrence rates (%) of conformational families of **9e** considering MM conformers within 5 kcal/mol from the global minimum.

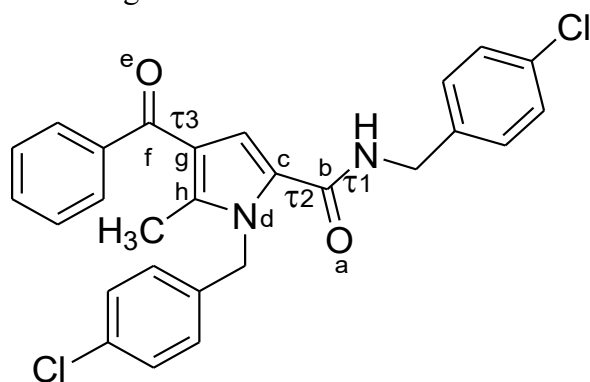

| Family | $\Delta E_{GM}^a$<br>(kcal/mol) | Torsional Angles ( $^\circ$ ) |             |             | Occurrence Rate<br>(%) |
|--------|---------------------------------|-------------------------------|-------------|-------------|------------------------|
|        |                                 | $\tau 1^b$                    | $\tau 2^c$  | $\tau 3^d$  |                        |
| TTT    | 0.00-4.82                       | $\sim 180$                    | $\sim 180$  | $\sim 180$  | 26                     |
| TTC    | 0.05-4.99                       | $\sim 180$                    | $\sim 180$  | $\sim 0.00$ | 22                     |
| TCC    | 1.64-4.58                       | $\sim 180$                    | $\sim 0.00$ | $\sim 0.00$ | 27                     |
| TCT    | 1.74-4.76                       | $\sim 180$                    | $\sim 0.00$ | $\sim 180$  | 25                     |

<sup>a</sup>The values reported refer to the lowest and the highest energy conformers of the family. <sup>b</sup>  $\tau 1$  torsional angle is calculated considering the amide bond atoms. <sup>c</sup>  $\tau 2$ : a, b, c, and d atoms. <sup>d</sup>  $\tau 3$ : e, f, g, and h atoms.

**Table S8.**  $\Delta E_{GM}$  values (kcal/mol), torsional angle values (degrees) and occurrence rates (%) of conformational families of **9f** considering MM conformers within 5 kcal/mol from the global minimum.

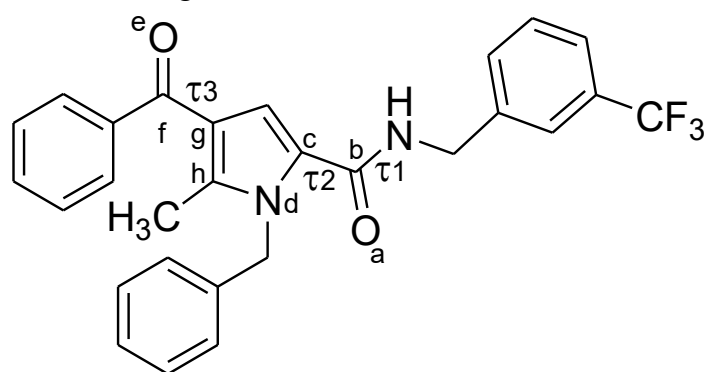

| Family | $\Delta E_{GM}^a$<br>(kcal/mol) | Torsional Angles ( $^\circ$ ) |            |            | Occurrence Rate<br>(%) |
|--------|---------------------------------|-------------------------------|------------|------------|------------------------|
|        |                                 | $\tau 1^b$                    | $\tau 2^c$ | $\tau 3^d$ |                        |
| TTT    | 0.00-4.98                       | ~180                          | ~180       | ~180       | 22                     |
| TTC    | 0.33-4.99                       | ~180                          | ~180       | ~0.00      | 26                     |
| TCT    | 1.95-4.98                       | ~180                          | ~0.00      | ~180       | 24                     |
| TCC    | 2.37-4.90                       | ~180                          | ~0.00      | ~0.00      | 28                     |

<sup>a</sup>The values reported refer to the lowest and the highest energy conformers of the family. <sup>b</sup>  $\tau 1$  torsional angle is calculated considering the amide bond atoms. <sup>c</sup>  $\tau 2$ : a, b, c, and d atoms. <sup>d</sup>  $\tau 3$ : e, f, g, and h atoms.



**Table S9.**  $\Delta E_{GM}$  values (kcal/mol), torsional angle values (degrees) and occurrence rates (%) of conformational families of **9g** considering MM conformers within 5 kcal/mol from the global minimum.

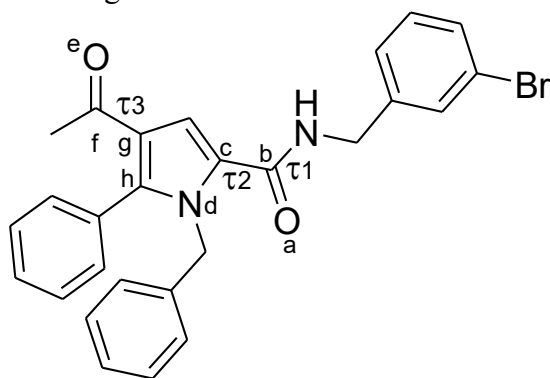

| Family | $\Delta E_{GM}^a$<br>(kcal/mol) | Torsional Angles ( $^\circ$ ) |            |            | Occurrence Rate<br>(%) |
|--------|---------------------------------|-------------------------------|------------|------------|------------------------|
|        |                                 | $\tau 1^b$                    | $\tau 2^c$ | $\tau 3^d$ |                        |
| TTC    | 0.00-4.98                       | ~180                          | ~180       | ~0.00      | 20                     |
| TTT    | 0.32-4.99                       | ~180                          | ~180       | ~180       | 24                     |
| TCC    | 2.57-4.99                       | ~180                          | ~0.00      | ~0.00      | 27                     |
| TCT    | 2.63-4.98                       | ~180                          | ~0.00      | ~180       | 29                     |

<sup>a</sup>The values reported refer to the lowest and the highest energy conformers of the family. <sup>b</sup>  $\tau 1$  torsional angle is calculated considering the amide bond atoms. <sup>c</sup>  $\tau 2$ : a, b, c, and d atoms.

**Table S10.**  $\Delta E_{\text{GM}}$  values (kcal/mol), torsional angle values (degrees) and occurrence rates (%) of conformational families of **9h** considering MM conformers within 5 kcal/mol from the global minimum.

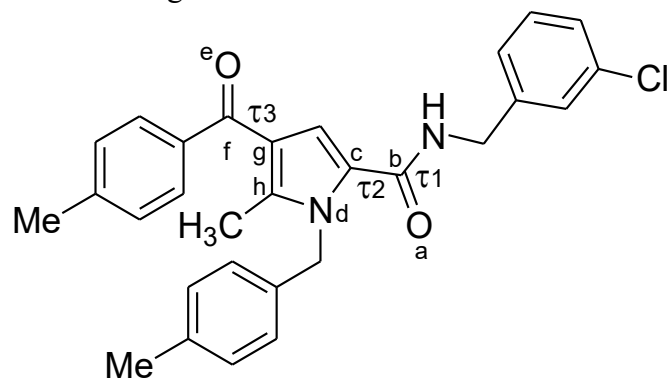

| Family | $\Delta E_{\text{GM}}^a$<br>(kcal/mol) | Torsional Angles ( $^\circ$ ) |            |            | Occurrence Rate<br>(%) |
|--------|----------------------------------------|-------------------------------|------------|------------|------------------------|
|        |                                        | $\tau 1^b$                    | $\tau 2^c$ | $\tau 3^d$ |                        |
| TTT    | 0.00-4.99                              | ~180                          | ~180       | ~180       | 25                     |
| TTC    | 0.05-4.94                              | ~180                          | ~180       | ~0.00      | 23                     |
| TCC    | 2.02-4.91                              | ~180                          | ~0.00      | ~0.00      | 29                     |
| TCT    | 2.19-4.92                              | ~180                          | ~0.00      | ~180       | 23                     |

<sup>a</sup>The values reported refer to the lowest and the highest energy conformers of the family. <sup>b</sup>  $\tau 1$  torsional angle is calculated considering the amide bond atoms. <sup>c</sup>  $\tau 2$ : a, b, c, and d atoms. <sup>d</sup>  $\tau 3$ : e, f, g, and h atoms.

**Table S11.**  $\Delta E_{\text{GM}}$  values (kcal/mol), torsional angle values (degrees) and occurrence rates (%) of conformational families of **9i** considering MM conformers within 5 kcal/mol from the global minimum.

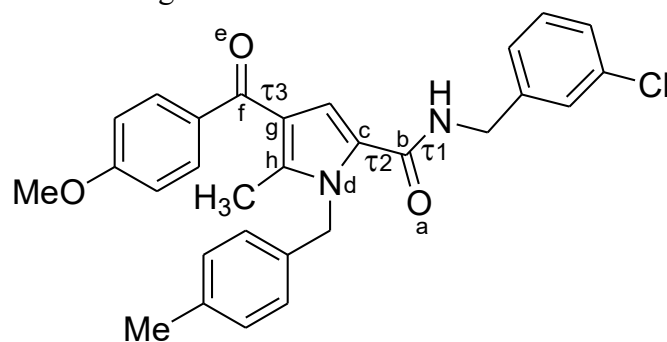

| Family | $\Delta E_{\text{GM}}^a$<br>(kcal/mol) | Torsional Angles ( $^\circ$ ) |             |             | Occurrence Rate<br>(%) |
|--------|----------------------------------------|-------------------------------|-------------|-------------|------------------------|
|        |                                        | $\tau 1^b$                    | $\tau 2^c$  | $\tau 3^d$  |                        |
| TTC    | 0.00-4.94                              | $\sim 180$                    | $\sim 180$  | $\sim 0.00$ | 25                     |
| TTT    | 0.15-4.98                              | $\sim 180$                    | $\sim 180$  | $\sim 180$  | 20                     |
| TCT    | 2.19-4.99                              | $\sim 180$                    | $\sim 0.00$ | $\sim 180$  | 26                     |
| TCC    | 2.38-4.87                              | $\sim 180$                    | $\sim 0.00$ | $\sim 0.00$ | 29                     |

<sup>a</sup>The values reported refer to the lowest and the highest energy conformers of the family. <sup>b</sup> $\tau 1$  torsional angle is calculated considering the amide bond atoms. <sup>c</sup> $\tau 2$ : a, b, c, and d atoms. <sup>d</sup> $\tau 3$ : e, f, g, and h atoms.

**Table S12.**  $\Delta E_{\text{GM}}$  values (kcal/mol), torsional angle values (degrees) and occurrence rates (%) of conformational families of **(R)-10b** considering MM conformers within 5 kcal/mol from the global minimum.

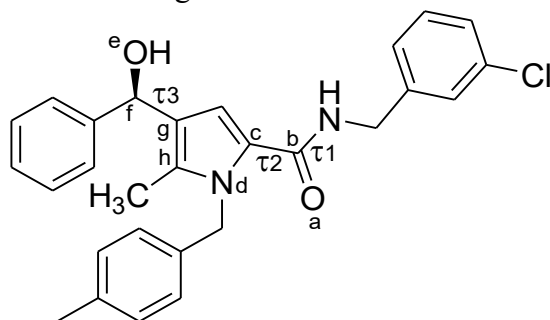

| Family           | $\Delta E_{\text{GM}}^a$<br>(kcal/mol) | Torsional Angles ( $^\circ$ ) |            |            | Occurrence<br>Rate<br>(%) |
|------------------|----------------------------------------|-------------------------------|------------|------------|---------------------------|
|                  |                                        | $\tau 1^b$                    | $\tau 2^c$ | $\tau 3^d$ |                           |
| TTA <sup>-</sup> | 0.00-4.80                              | ~180                          | ~180       | ~-120      | 19                        |
| TTT              | 0.07-4.80                              | ~180                          | ~180       | ~180       | 21                        |
| TCT              | 1.76-4.96                              | ~180                          | ~-0.00     | ~180       | 27.5                      |
| TTG <sup>+</sup> | 2.16-4.77                              | ~180                          | ~180       | ~-60       | 12                        |
| TCA <sup>-</sup> | 2.75-4.37                              | ~180                          | ~-0.00     | ~-120      | 19                        |
| TTG <sup>-</sup> | 3.36-3.66                              | ~180                          | ~180       | ~-60       | 1                         |
| TCG <sup>-</sup> | 4.88                                   | ~180                          | ~-0.00     | ~-60       | 0.5                       |

<sup>a</sup>The values reported refer to the lowest and the highest energy conformers of the family. <sup>b</sup> $\tau 1$  torsional angle is calculated considering the amide bond atoms. <sup>c</sup> $\tau 2$ : a, b, c, and d atoms. <sup>d</sup> $\tau 3$ : e, f, g, and h atoms.

**Table S13.** Conformational energy, structural classification, and pharmacophore distances (Å) of calculated DFT conformers of **(R)-10b**.

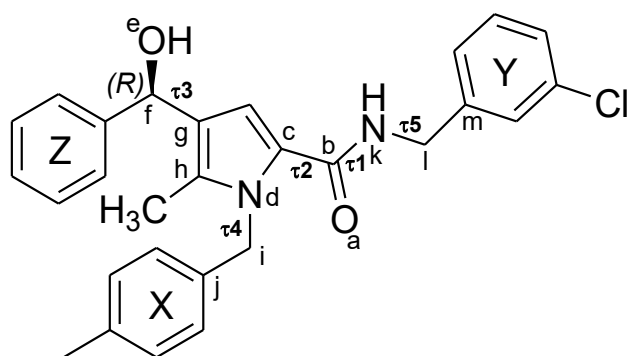

| Family <sup>a</sup> | Sub-family | $\Delta E_{GM}$<br>(kcal/mol) | Distances (Å) |             |             | Torsional Angles (°) <sup>b-f</sup> |          |          |          |          |
|---------------------|------------|-------------------------------|---------------|-------------|-------------|-------------------------------------|----------|----------|----------|----------|
|                     |            |                               | d1<br>(X-Y)   | d2<br>(X-Z) | d3<br>(Y-Z) | $\tau_1$                            | $\tau_2$ | $\tau_3$ | $\tau_4$ | $\tau_5$ |
| TCG <sup>-</sup>    | III        | 0.00                          | 9.6           | 8.3         | 7.9         | -173                                | 23       | -85      | 95       | 121      |
| TCA <sup>-</sup>    | I          | 0.60                          | 7.0           | 7.1         | 9.5         | -172                                | 23       | -145     | 95       | -103     |
| TCG <sup>+</sup>    | III        | 0.89                          | 7.3           | 7.0         | 10.3        | 174                                 | -22      | 64       | -94      | 112      |

<sup>a</sup> The data reported are referred to the enantiomer R, the enantiomer S presents the same conformational energy, the same pharmacophore distances, and the same absolute torsion angle values but with opposite sign. <sup>b</sup> $\tau_1$  torsional angle is calculated considering the amide bond atoms. <sup>c</sup> $\tau_2$ : a, b, c, and d atoms. <sup>d</sup> $\tau_3$ : e, f, g, and h atoms. <sup>e</sup> $\tau_4$ : c, d, i, and j atoms. <sup>f</sup> $\tau_5$ : b, k, l, and m atoms.

**Table S14.** Conformational energy, structural classification, and pharmacophore distances (Å) of calculated DFT conformers of **9g**.

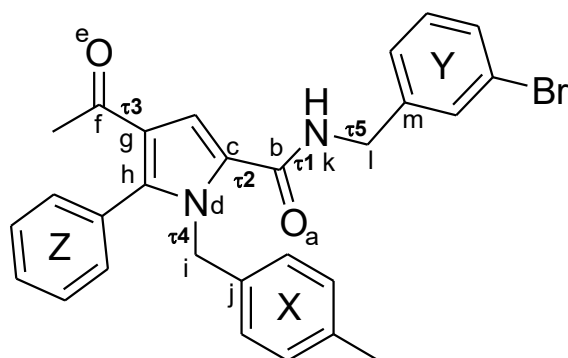

| Family <sup>a</sup> | Sub-family | $\Delta E_{\text{GM}}$<br>(kcal/mol) | Distances (Å) |             |             | Torsional Angles (°) <sup>b-f</sup> |          |          |          |          |
|---------------------|------------|--------------------------------------|---------------|-------------|-------------|-------------------------------------|----------|----------|----------|----------|
|                     |            |                                      | d1<br>(X-Y)   | d2<br>(X-Z) | d3<br>(Y-Z) | $\tau_1$                            | $\tau_2$ | $\tau_3$ | $\tau_4$ | $\tau_5$ |
| TCC                 | I          | 0.00                                 | 6.1           | 5.7         | 10.4        | -173                                | 27       | -2       | 71       | -107     |
| TTC                 | IV         | 1.91                                 | 4.5           | 5.4         | 9.2         | 165                                 | 154      | 3        | 90       | -176     |

<sup>a</sup> The data reported are referred to the enantiomer E1, the other enantiomer presents the same conformational energy, the same pharmacophore distances, and the same absolute torsion angle values but with opposite sign. <sup>b</sup> $\tau_1$  torsional angle is calculated considering the amide bond atoms. <sup>c</sup> $\tau_2$ : a, b, c, and d atoms. <sup>d</sup> $\tau_3$ : e, f, g, and h atoms. <sup>e</sup> $\tau_4$ : c, d, i, and j atoms. <sup>f</sup> $\tau_5$ : b, k, l, and m atoms.

**Table S15.** Conformational energy, structural classification, and intramolecular distances (Å) of calculated DFT conformers of **1**.

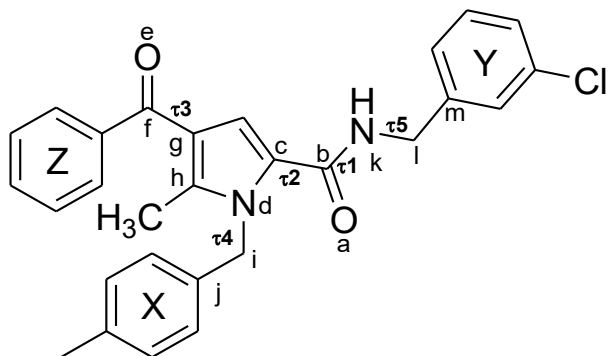

| Family <sup>a</sup> | Sub-family | $\Delta E_{GM}$<br>(kcal/mol) | Distances (Å) |             |             | Torsional Angles (°) <sup>b-f</sup> |          |          |          |          |
|---------------------|------------|-------------------------------|---------------|-------------|-------------|-------------------------------------|----------|----------|----------|----------|
|                     |            |                               | d1<br>(X-Y)   | d2<br>(X-Z) | d3<br>(Y-Z) | $\tau_1$                            | $\tau_2$ | $\tau_3$ | $\tau_4$ | $\tau_5$ |
| TCC                 | I          | 0.00                          | 7.1           | 8.7         | 9.2         | -173                                | 25       | -21      | 94       | -111     |
| TCC                 | II         | 0.57                          | 6.1           | 9.3         | 10.1        | -174                                | 26       | 22       | 84       | -84      |
| TCT                 | I          | 1.66                          | 7.5           | 7.2         | 11.0        | -174                                | 26       | -148     | 101      | -113     |
| TCT                 | I          | 1.66                          | 9.4           | 7.3         | 10.6        | 172                                 | -24      | -149     | 111      | -124     |

<sup>a</sup> The data reported are referred to the enantiomer E1, the other enantiomer presents the same conformational energy, the same pharmacophore distances, and the same absolute torsion angle values but with opposite sign. <sup>b</sup> $\tau_1$  torsional angle is calculated considering the amide bond atoms. <sup>c</sup> $\tau_2$ : a, b, c, and d atoms. <sup>d</sup> $\tau_3$ : e, f, g, and h atoms. <sup>e</sup> $\tau_4$ : c, d, i, and j atoms. <sup>f</sup> $\tau_5$ : b, k, l, and m atoms.

**Table S16.** Conformational energy, structural classification, and intramolecular distances (Å) of calculated DFT conformers of **9a**.

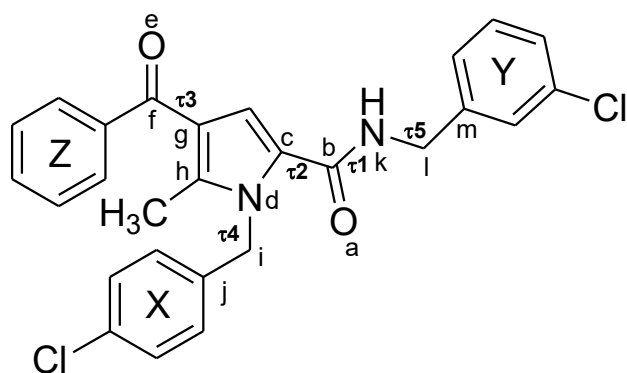

| Family <sup>a</sup> | Sub-family | $\Delta E_{GM}$<br>(kcal/mol) | Distances (Å) |             |             | Torsional Angles (°) <sup>b-f</sup> |          |          |          |          |
|---------------------|------------|-------------------------------|---------------|-------------|-------------|-------------------------------------|----------|----------|----------|----------|
|                     |            |                               | d1<br>(X-Y)   | d2<br>(X-Z) | d3<br>(Y-Z) | $\tau_1$                            | $\tau_2$ | $\tau_3$ | $\tau_4$ | $\tau_5$ |
| TCC                 | I          | 0.00                          | 7.0           | 8.7         | 9.3         | -173                                | 25       | -21      | 91       | -110     |
| TCC                 | II         | 0.43                          | 6.7           | 9.2         | 10.1        | -174                                | 25       | 22       | 98       | -82      |
| TCT                 | I          | 1.59                          | 7.1           | 7.3         | 10.9        | -172                                | 26       | -147     | 99       | -105     |
| TCT                 | III        | 1.67                          | 9.6           | 7.3         | 10.8        | -173                                | 25       | -147     | 98       | 120      |

<sup>a</sup> The data reported are referred to the enantiomer E1, the other enantiomer presents the same conformational energy, the same pharmacophore distances, and the same absolute torsion angle values but with opposite sign. <sup>b</sup> $\tau_1$  torsional angle is calculated considering the amide bond atoms. <sup>c</sup> $\tau_2$ : a, b, c, and d atoms. <sup>d</sup> $\tau_3$ : e, f, g, and h atoms. <sup>e</sup> $\tau_4$ : c, d, i, and j atoms. <sup>f</sup> $\tau_5$ : b, k, l, and m atoms.



**Table S17.** Conformational energy, structural classification, and intramolecular distances (Å) of calculated DFT conformers of **9b**.

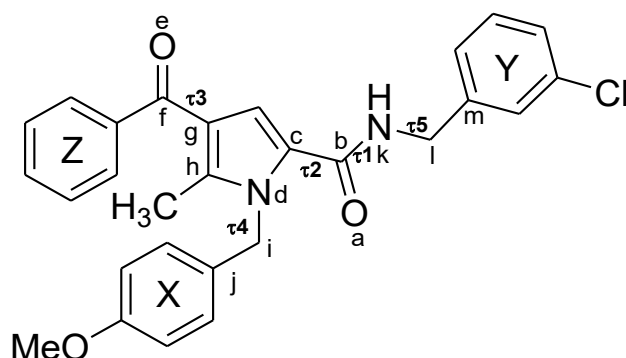

| Family <sup>a</sup> | Sub-family | $\Delta E_{GM}$<br>(kcal/mol) | Distances (Å) |             |             | Torsional Angles (°) <sup>b-f</sup> |          |          |          |          |
|---------------------|------------|-------------------------------|---------------|-------------|-------------|-------------------------------------|----------|----------|----------|----------|
|                     |            |                               | d1<br>(X-Y)   | d2<br>(X-Z) | d3<br>(Y-Z) | $\tau_1$                            | $\tau_2$ | $\tau_3$ | $\tau_4$ | $\tau_5$ |
| TCC                 | I          | 0.00                          | 6.4           | 9.3         | 9.7         | -173                                | 28       | 22       | 78       | -112     |
| TCC                 | II         | 0.27                          | 5.7           | 9.3         | 10.1        | -174                                | 26       | 22       | 76       | -83      |
| TCT                 | I          | 1.31                          | 7.5           | 7.2         | 11.0        | -174                                | 26       | -148     | 102      | -112     |
| TCT                 | III        | 1.38                          | 9.7           | 7.2         | 10.9        | -173                                | 26       | -148     | 102      | 120      |

<sup>a</sup> The data reported are referred to the enantiomer E1, the other enantiomer presents the same conformational energy, the same pharmacophore distances, and the same absolute torsion angle values but with opposite sign. <sup>b</sup> $\tau_1$  torsional angle is calculated considering the amide bond atoms. <sup>c</sup> $\tau_2$ : a, b, c, and d atoms. <sup>d</sup> $\tau_3$ : e, f, g, and h atoms. <sup>e</sup> $\tau_4$ : c, d, i, and j atoms. <sup>f</sup> $\tau_5$ : b, k, l, and m atoms.

**Table S18.** Conformational energy, structural classification, and intramolecular distances (Å) of calculated DFT conformers of **9c**.

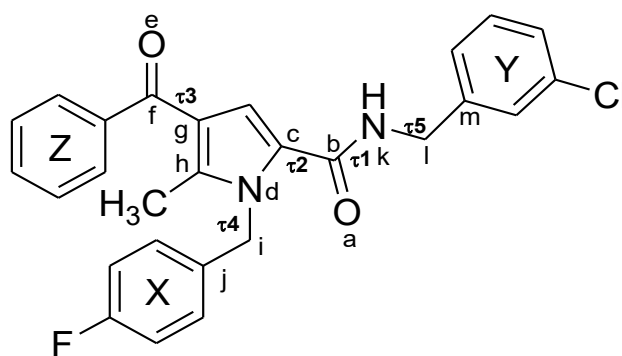

| Family <sup>a</sup> | Sub-family | $\Delta E_{GM}$<br>(kcal/mol) | Distances (Å) |             |             | Torsional Angles (°) <sup>b-f</sup> |          |          |          |          |
|---------------------|------------|-------------------------------|---------------|-------------|-------------|-------------------------------------|----------|----------|----------|----------|
|                     |            |                               | d1<br>(X-Y)   | d2<br>(X-Z) | d3<br>(Y-Z) | $\tau_1$                            | $\tau_2$ | $\tau_3$ | $\tau_4$ | $\tau_5$ |
| TCC                 | I          | 0.00                          | 6.5           | 9.3         | 9.6         | -174                                | 26       | 22       | 79       | -115     |
| TCC                 | II         | 0.24                          | 5.9           | 9.3         | 10.1        | -174                                | 26       | 22       | 78       | -85      |
| TCT                 | I          | 1.33                          | 7.5           | 7.2         | 10.9        | -175                                | 25       | -147     | 101      | -116     |
| TCT                 | III        | 1.42                          | 9.7           | 7.3         | 10.8        | -173                                | 26       | -147     | 101      | 124      |

<sup>a</sup> The data reported are referred to the enantiomer E1, the other enantiomer presents the same conformational energy, the same pharmacophore distances, and the same absolute torsion angle values but with opposite sign. <sup>b</sup>  $\tau_1$  torsional angle is calculated considering the amide bond atoms. <sup>c</sup>  $\tau_2$ : a, b, c, and d atoms. <sup>d</sup>  $\tau_3$ : e, f, g, and h atoms. <sup>e</sup>  $\tau_4$ : c, d, i, and j atoms. <sup>f</sup>  $\tau_5$ : b, k, l, and m atoms.

**Table S19.** Conformational energy, structural classification, and intramolecular distances (Å) of calculated DFT conformers of **9d**.

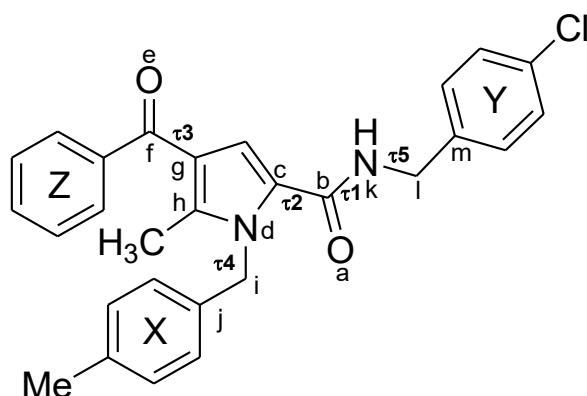

| Family <sup>a</sup> | Sub-family | $\Delta E_{GM}$<br>(kcal/mol) | Distances (Å) |             |             | Torsional Angles (°) <sup>b-f</sup> |          |          |          |          |
|---------------------|------------|-------------------------------|---------------|-------------|-------------|-------------------------------------|----------|----------|----------|----------|
|                     |            |                               | d1<br>(X-Y)   | d2<br>(X-Z) | d3<br>(Y-Z) | $\tau_1$                            | $\tau_2$ | $\tau_3$ | $\tau_4$ | $\tau_5$ |
| TCC                 | I          | 0.00                          | 7.2           | 9.2         | 9.7         | -173                                | 27       | 22       | 99       | -111     |
| TCC                 | II         | 0.29                          | 6.7           | 9.2         | 10.1        | -174                                | 26       | 22       | 99       | -82      |
| TCT                 | I          | 1.46                          | 7.4           | 7.3         | 10.9        | -174                                | 26       | -147     | 100      | -113     |
| TCT                 | III        | 1.50                          | 9.7           | 7.3         | 10.7        | -173                                | 26       | -147     | 100      | 120      |

<sup>a</sup> The data reported are referred to the enantiomer E1, the other enantiomer presents the same conformational energy, the same pharmacophore distances, and the same absolute torsion angle values but with opposite sign. <sup>b</sup> $\tau_1$  torsional angle is calculated considering the amide bond atoms. <sup>c</sup> $\tau_2$ : a, b, c, and d atoms. <sup>d</sup> $\tau_3$ : e, f, g, and h atoms. <sup>e</sup> $\tau_4$ : c, d, i, and j atoms. <sup>f</sup> $\tau_5$ : b, k, l, and m atoms.

**Table S20.** Conformational energy, structural classification, and intramolecular distances (Å) of calculated DFT conformers of **9e**.

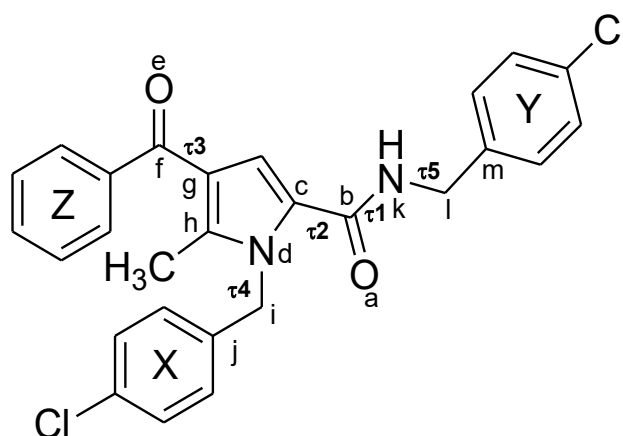

| Family <sup>a</sup> | Sub-family | $\Delta E_{GM}$<br>(kcal/mol) | Distances (Å) |             |             | Torsional Angles (°) <sup>b-f</sup> |          |          |          |          |
|---------------------|------------|-------------------------------|---------------|-------------|-------------|-------------------------------------|----------|----------|----------|----------|
|                     |            |                               | d1<br>(X-Y)   | d2<br>(X-Z) | d3<br>(Y-Z) | $\tau_1$                            | $\tau_2$ | $\tau_3$ | $\tau_4$ | $\tau_5$ |
| TCC                 | I          | 0.00                          | 6.8           | 9.2         | 9.7         | -173                                | 26       | 22       | 87       | -112     |
| TCC                 | II         | 0.18                          | 6.7           | 9.2         | 10.1        | -174                                | 26       | 22       | 98       | -85      |
| TCT                 | I          | 1.38                          | 7.3           | 7.3         | 10.8        | -173                                | 26       | -147     | 100      | -112     |
| TCT                 | III        | 1.40                          | 9.5           | 7.3         | 10.7        | -172                                | 23       | -147     | 99       | 131      |

<sup>a</sup> The data reported are referred to the enantiomer E1, the other enantiomer presents the same conformational energy, the same pharmacophore distances, and the same absolute torsion angle values but with opposite sign. <sup>b</sup> $\tau_1$  torsional angle is calculated considering the amide bond atoms. <sup>c</sup> $\tau_2$ : a, b, c, and d atoms. <sup>d</sup> $\tau_3$ : e, f, g, and h atoms. <sup>e</sup> $\tau_4$ : c, d, i, and j atoms. <sup>f</sup> $\tau_5$ : b, k, l, and m atoms.

**Table S21.** Conformational energy, structural classification, and intramolecular distances (Å) of calculated DFT conformers of **9f**.

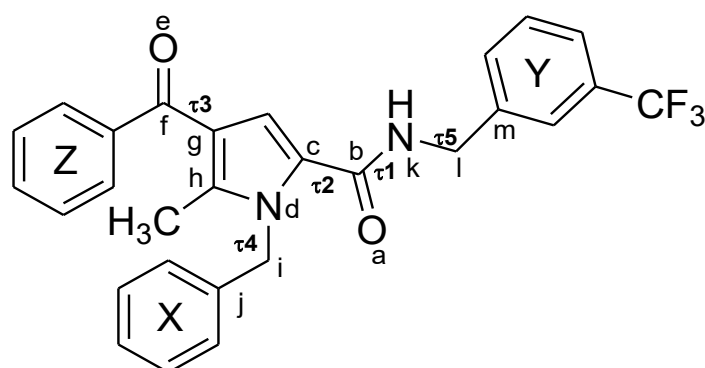

| Family <sup>a</sup> | Sub-family | $\Delta E_{GM}$<br>(kcal/mol) | Distances (Å) |             |             | Torsional Angles (°) <sup>b-f</sup> |          |          |          |          |
|---------------------|------------|-------------------------------|---------------|-------------|-------------|-------------------------------------|----------|----------|----------|----------|
|                     |            |                               | d1<br>(X-Y)   | d2<br>(X-Z) | d3<br>(Y-Z) | $\tau_1$                            | $\tau_2$ | $\tau_3$ | $\tau_4$ | $\tau_5$ |
| TCC                 | I          | 0.00                          | 7.3           | 9.2         | 9.8         | -174                                | 26       | 22       | 99       | -110     |
| TCC                 | II         | 0.31                          | 6.3           | 9.2         | 10.2        | -177                                | 27       | 24       | 88       | -81      |
| TCT                 | I          | 1.44                          | 7.1           | 7.3         | 10.9        | -172                                | 27       | -147     | 100      | -103     |
| TCT                 | I          | 1.57                          | 9.3           | 7.3         | 10.5        | 172                                 | -24      | -148     | 111      | -121     |

<sup>a</sup> The data reported are referred to the enantiomer E1, the other enantiomer presents the same conformational energy, the same pharmacophore distances, and the same absolute torsion angle values but with opposite sign. <sup>b</sup> $\tau_1$  torsional angle is calculated considering the amide bond atoms. <sup>c</sup> $\tau_2$ : a, b, c, and d atoms. <sup>d</sup> $\tau_3$ : e, f, g, and h atoms. <sup>e</sup> $\tau_4$ : c, d, i, and j atoms. <sup>f</sup> $\tau_5$ : b, k, l, and m atoms.

**Table S22.** Conformational energy, structural classification, and intramolecular distances (Å) of calculated DFT conformers of **9h**.

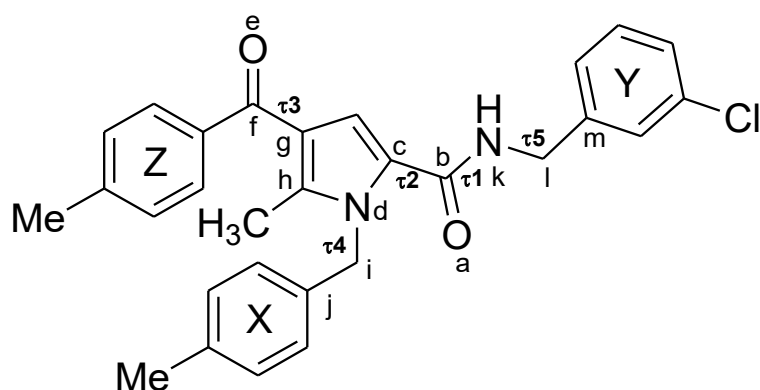

| Family <sup>a</sup> | Sub-family | $\Delta E_{GM}$<br>(kcal/mol) | Distances (Å) |             |             | Torsional Angles (°) <sup>b-f</sup> |          |          |          |          |
|---------------------|------------|-------------------------------|---------------|-------------|-------------|-------------------------------------|----------|----------|----------|----------|
|                     |            |                               | d1<br>(X-Y)   | d2<br>(X-Z) | d3<br>(Y-Z) | $\tau_1$                            | $\tau_2$ | $\tau_3$ | $\tau_4$ | $\tau_5$ |
| TCC                 | I          | 0.00                          | 7.3           | 9.2         | 9.8         | -173                                | 27       | 24       | 99       | -110     |
| TCC                 | II         | 0.40                          | 6.2           | 9.3         | 10.1        | -174                                | 26       | 23       | 84       | -84      |
| TCT                 | I          | 1.40                          | 7.2           | 7.3         | 10.9        | -172                                | 27       | -145     | 100      | -105     |
| TCT                 | I          | 1.44                          | 9.3           | 7.3         | 10.6        | 173                                 | -23      | -147     | 110      | -122     |

<sup>a</sup> The data reported are referred to the enantiomer E1, the other enantiomer presents the same conformational energy, the same pharmacophore distances, and the same absolute torsion angle values but with opposite sign. <sup>b</sup> $\tau_1$  torsional angle is calculated considering the amide bond atoms. <sup>c</sup> $\tau_2$ : a, b, c, and d atoms. <sup>d</sup> $\tau_3$ : e, f, g, and h atoms. <sup>e</sup> $\tau_4$ : c, d, i, and j atoms. <sup>f</sup> $\tau_5$ : b, k, l, and m atoms.

**Table S23.** Conformational energy, structural classification, and intramolecular distances (Å) of calculated DFT conformers of **9i**.

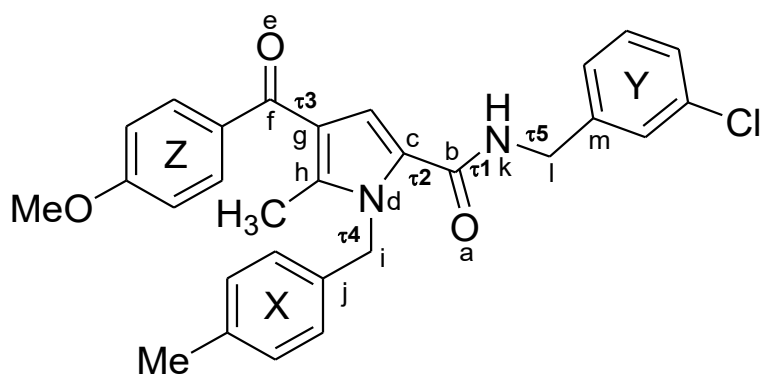

| Family <sup>a</sup> | Sub-family | $\Delta E_{GM}$<br>(kcal/mol) | Distances (Å) |             |             | Torsional Angles (°) <sup>b-f</sup> |          |          |          |          |
|---------------------|------------|-------------------------------|---------------|-------------|-------------|-------------------------------------|----------|----------|----------|----------|
|                     |            |                               | d1<br>(X-Y)   | d2<br>(X-Z) | d3<br>(Y-Z) | $\tau_1$                            | $\tau_2$ | $\tau_3$ | $\tau_4$ | $\tau_5$ |
| TCC                 | I          | 0.00                          | 7.4           | 9.2         | 9.8         | -174                                | 26       | 26       | 98       | -114     |
| TCC                 | II         | 0.23                          | 6.1           | 9.3         | 10.2        | -174                                | 26       | 26       | 84       | -84      |
| TCT                 | I          | 1.21                          | 7.4           | 7.2         | 10.9        | -174                                | 26       | -143     | 100      | -112     |
| TCT                 | I          | 1.30                          | 9.4           | 7.3         | 10.5        | 172                                 | -24      | -145     | 110      | -125     |

<sup>a</sup> The data reported are referred to the enantiomer E1, the other enantiomer presents the same conformational energy, the same pharmacophore distances, and the same absolute torsion angle values but with opposite sign. <sup>b</sup> $\tau_1$  torsional angle is calculated considering the amide bond atoms. <sup>c</sup> $\tau_2$ : a, b, c, and d atoms. <sup>d</sup> $\tau_3$ : e, f, g, and h atoms. <sup>e</sup> $\tau_4$ : c, d, i, and j atoms. <sup>f</sup> $\tau_5$ : b, k, l, and m atoms.

**Table S24.** TSP conformers grouped according to the intramolecular distances between the X, Y, and Z rings.

| Group | Conformer        | Compounds                    | Distances (Å) <sup>a</sup> |             |             | Pharmacophore <sup>b</sup> |
|-------|------------------|------------------------------|----------------------------|-------------|-------------|----------------------------|
|       |                  |                              | d1<br>(X-Y)                | d2<br>(X-Z) | d3<br>(Y-Z) |                            |
| A     | TCC I            | <b>1, 9a-f, 9h-i and 10a</b> | 7.0                        | 9.1         | 9.6         | 1                          |
| B     | TCC II           | <b>1, 9a-f, 9h-i and 10a</b> | 6.2                        | 9.3         | 10.1        | -                          |
| C     | TCT I            | <b>1, 9a-f, 9h-i and 10a</b> | 7.3                        | 7.2         | 10.9        | 2                          |
| C     | TCA <sup>-</sup> | <b>(±)-10b</b>               | 7.0                        | 7.1         | 9.5         | 2                          |
| C     | TCG <sup>+</sup> | <b>(±)-10b</b>               | 7.3                        | 7.0         | 10.3        | 2                          |
| D     | TCT I            | <b>1, 9d, 9h, 9i</b>         | 9.3                        | 7.3         | 10.5        | -                          |
| E     | TCT III          | <b>9a-c, 9e-f and 10a</b>    | 9.7                        | 7.3         | 10.8        | -                          |
| F     | TCC I            | <b>9g</b>                    | 6.1                        | 5.6         | 10.4        | 3                          |
| G     | TTC IV           | <b>9g</b>                    | 4.5                        | 5.4         | 9.2         | -                          |
| H     | TCG <sup>-</sup> | <b>(±)-10b</b>               | 9.6                        | 8.3         | 7.9         | 4                          |

<sup>a</sup>Average values. <sup>b</sup> Conformers matching similarity criteria with the intra-molecular distances of the hot spot residues of hydrophobic PPI motifs.



**Table S25.** Distances between the centroids of the side chains of the hot-spot residues of the considered PPI motifs.

| Motifs                                              | PDB ID | Distances (Å) |         |           |         |           |           |
|-----------------------------------------------------|--------|---------------|---------|-----------|---------|-----------|-----------|
|                                                     |        | $i,i+3$       | $i,i+4$ | $i+3,i+4$ | $i,i+7$ | $i+4,i+7$ | $i+3,i+7$ |
| <sup>23</sup> VxxLxxxV <sup>30</sup> (Parallel)     | 2ZTA   | 6.6           | -       | -         | 10.1    | -         | 7.7       |
| <sup>14</sup> LxxxLxxL <sup>21</sup> (Antiparallel) | 1GRJ   | -             | 7.6     | -         | 10.2    | 6.8       | -         |
| <sup>345</sup> LxxLL <sup>349</sup>                 | 2J7X   | 6.9           | 5.2     | 7.2       | -       | -         | -         |

**Table S26.** Calculated RMSD (Å) by fitting the centroids of the aromatic rings X, Y, and Z of the DFT conformers of TSPs on the centroids of the side chains of the considered PPI motif.

| Pharmacophore | Cmpd       | Conformer        | RMSD (Å) <sup>a</sup>                                          |             |                                                                |      |
|---------------|------------|------------------|----------------------------------------------------------------|-------------|----------------------------------------------------------------|------|
|               |            |                  | <i>i i+3 i+7</i>                                               |             | <i>i i+4 i+7</i>                                               |      |
|               |            |                  | <sup>23</sup> V <sub>xx</sub> L <sub>xxx</sub> V <sup>30</sup> |             | <sup>14</sup> L <sub>xxx</sub> L <sub>xx</sub> L <sup>21</sup> |      |
|               |            |                  | Parallel coiled coil<br>PDB ID: 2ZTA                           |             | Antiparallel coiled coil<br>PDB ID: 1GRJ                       |      |
| 1             | <b>10a</b> | TCC I            | 1.94                                                           | <b>2.25</b> | <b>2.18</b>                                                    | 1.95 |
| 2             | <b>10a</b> | TCT I            | 1.80                                                           | <b>2.08</b> | <b>1.65</b>                                                    | 2.12 |
| 3             | <b>9g</b>  | TCC I            | 2.15                                                           | <b>2.42</b> | <b>2.35</b>                                                    | 2.40 |
| 4             | <b>10b</b> | TCG <sup>-</sup> | 1.99                                                           | <b>1.82</b> | <b>1.74</b>                                                    | 2.25 |

<sup>a</sup>The RMSD values calculated for the conformational enantiomer E2 or for the configurational enantiomer S of **10b** are evidenced in bold

**Table S27.** Calculated RMSD (Å) by fitting the centroids of the aromatic rings X, Y, and Z of the selected DFT conformers on the centroids of the side chains of the considered PPI motif on human p14<sup>ARF</sup>.

| Pharmacophore | Cmpd       | Sub-fam          | RMSD (Å)                             |             |                                      |      |
|---------------|------------|------------------|--------------------------------------|-------------|--------------------------------------|------|
|               |            |                  | <sup>20</sup> VRVFVVHI <sup>27</sup> |             | <sup>20</sup> VRVFVVHI <sup>27</sup> |      |
|               |            |                  | i, i+3, i+7                          |             | i, i+4, i+7                          |      |
| 1             | <b>10a</b> | TCC I            | 2.27                                 | <b>1.90</b> | <b>2.38</b>                          | 2.55 |
| 2             | <b>10a</b> | TCT I            | 1.62                                 | <b>1.47</b> | <b>1.99</b>                          | 2.34 |
| 3             | <b>9g</b>  | TCC I            | 2.51                                 | <b>2.11</b> | <b>2.08</b>                          | 2.03 |
| 4             | <b>10b</b> | TCG <sup>-</sup> | 1.63                                 | <b>1.93</b> | <b>2.45</b>                          | 2.06 |

<sup>a</sup>The RMSD values calculated for the conformational enantiomer E2 or for the configurational enantiomer S of **10b** are evidenced in bold

**Table S28.** cLogD<sub>7.4</sub> of compounds **1**, **9a-i**, and **10a-b**.

| <b>Cpd</b>     | <b>clog D<sub>7.4</sub></b> |
|----------------|-----------------------------|
| <b>1</b>       | 5.03                        |
| <b>9a</b>      | 5.63                        |
| <b>9b</b>      | 5.29                        |
| <b>9c</b>      | 4.65                        |
| <b>9d</b>      | 4.97                        |
| <b>9e</b>      | 5.29                        |
| <b>9f</b>      | 4.78                        |
| <b>9g</b>      | 5.29                        |
| <b>9h</b>      | 5.98                        |
| <b>9i</b>      | 4.77                        |
| <b>10a</b>     | 4.07                        |
| <b>(±) 10b</b> | 5.31                        |
| <b>Nut-3a</b>  | 5.00                        |

<sup>a</sup>ACD/Percepta 2017 software.

## Synthesis

### Scheme S1.

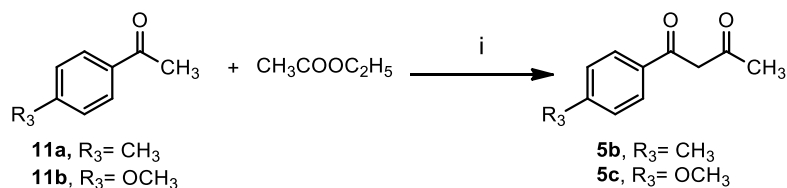

**Reagents and conditions:** i) NaH (60 % dispersion in mineral oil), dry DMF, rt, 3h, then 60°C, 1h.

#### 1-(4-Methylphenyl)butane-1,3-dione (**5b**)

To a solution of **11a** (0.350 g, 2.61 mmol) in dry ethyl acetate (2 mL) was added a suspension of NaH (0.157 g, 3.92 mmol, 60% dispersion in mineral oil) in dry DMF (3 mL). The reaction mixture was stirred at room temperature for 3h and then heated at 60 °C until no starting material was detected by TLC (7:3 *n*-hexane/EtOAc, ~ 1h). Solvent was removed, and after cooling to 0 °C the resulting mixture was acidified with 3M HCl to give a solid product which was washed with H<sub>2</sub>O and recrystallized (H<sub>2</sub>O/EtOH) to furnish the title compound **5b** as a pale yellow solid. Yield: 73%. <sup>1</sup>H NMR (300 MHz, CDCl<sub>3</sub>) (enol form) δ: 2.22 (s, 3H), 2.44 (s, 3H), 6.19 (s, 1H), 7.28 (d, 2H, *J* = 8.0 Hz), 7.81 (d, 2H, *J* = 8.0 Hz).

#### 1-(4-Methoxyphenyl)butane-1,3-dione (**5c**)

Starting from **11b** (0.280 g, 1.86 mmol) and following the same procedure reported for **5b**, the title compound was obtained as a white solid. Yield: 68%. <sup>1</sup>H NMR (CDCl<sub>3</sub>) (enol form) δ: 2.19 (s, 3H), 3.88 (s, 3H), 6.13 (s, 1H), 6.97 (d, 2H, *J* = 8.9 Hz), 7.89 (d, 2H, *J* = 8.8 Hz), 16.31 (s, 1H).

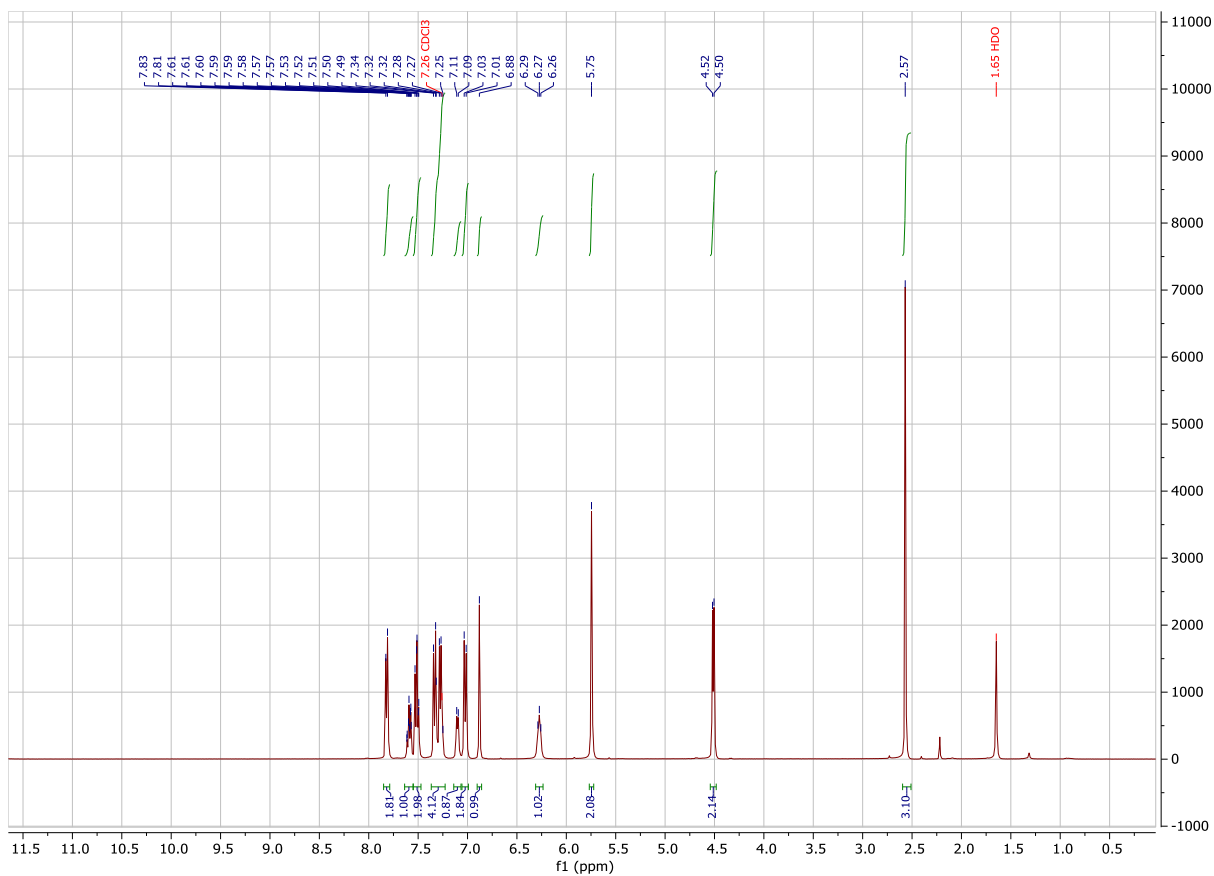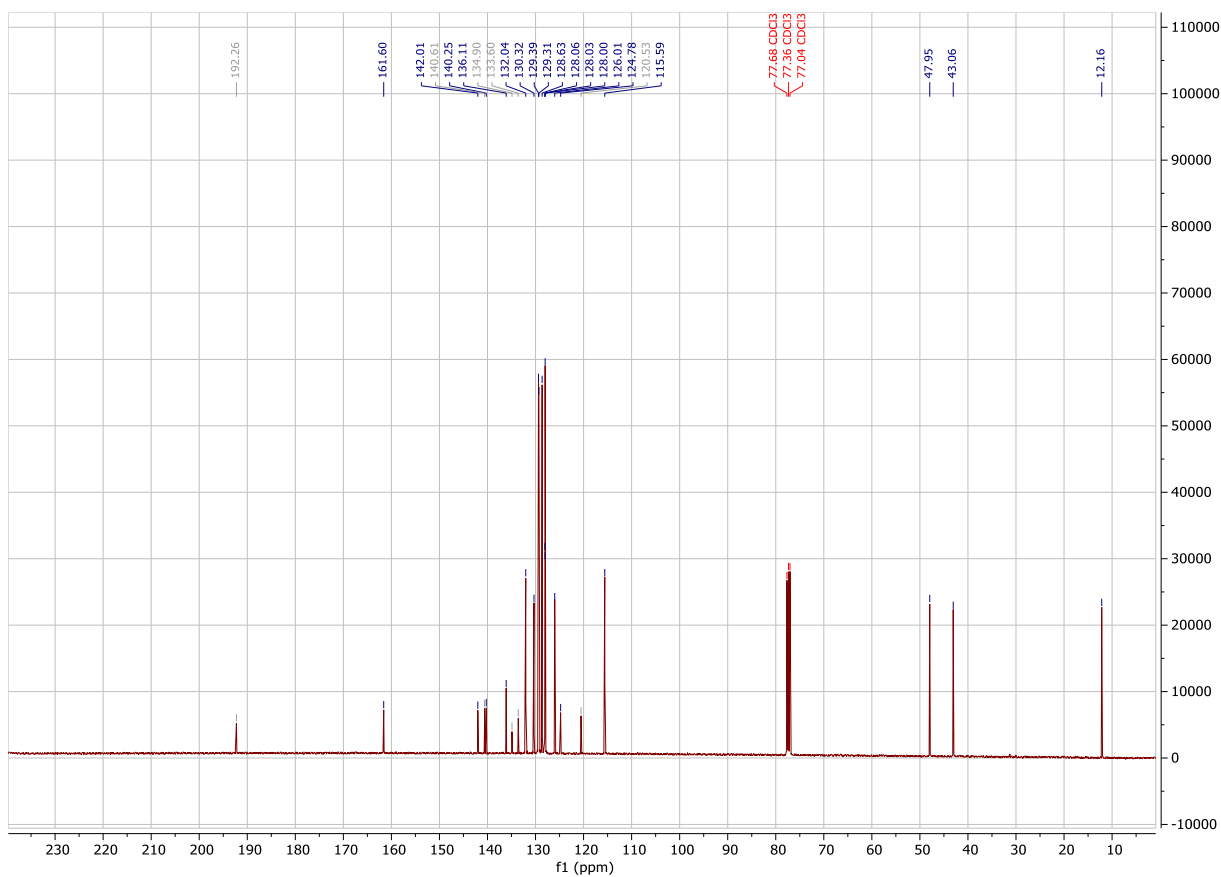

<sup>1</sup>H NMR (400 MHz, CDCl<sub>3</sub>) and <sup>13</sup>C NMR (101 MHz, CDCl<sub>3</sub>) of compound **9a**

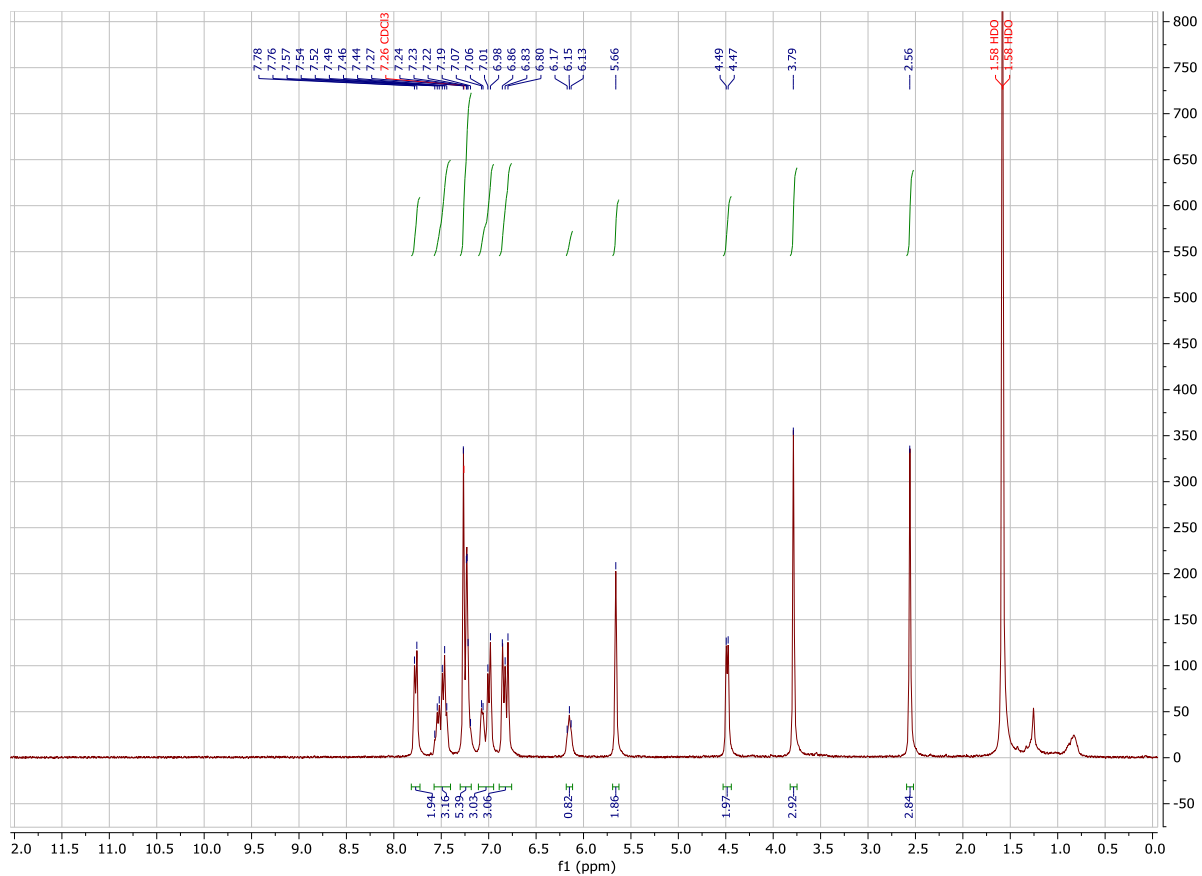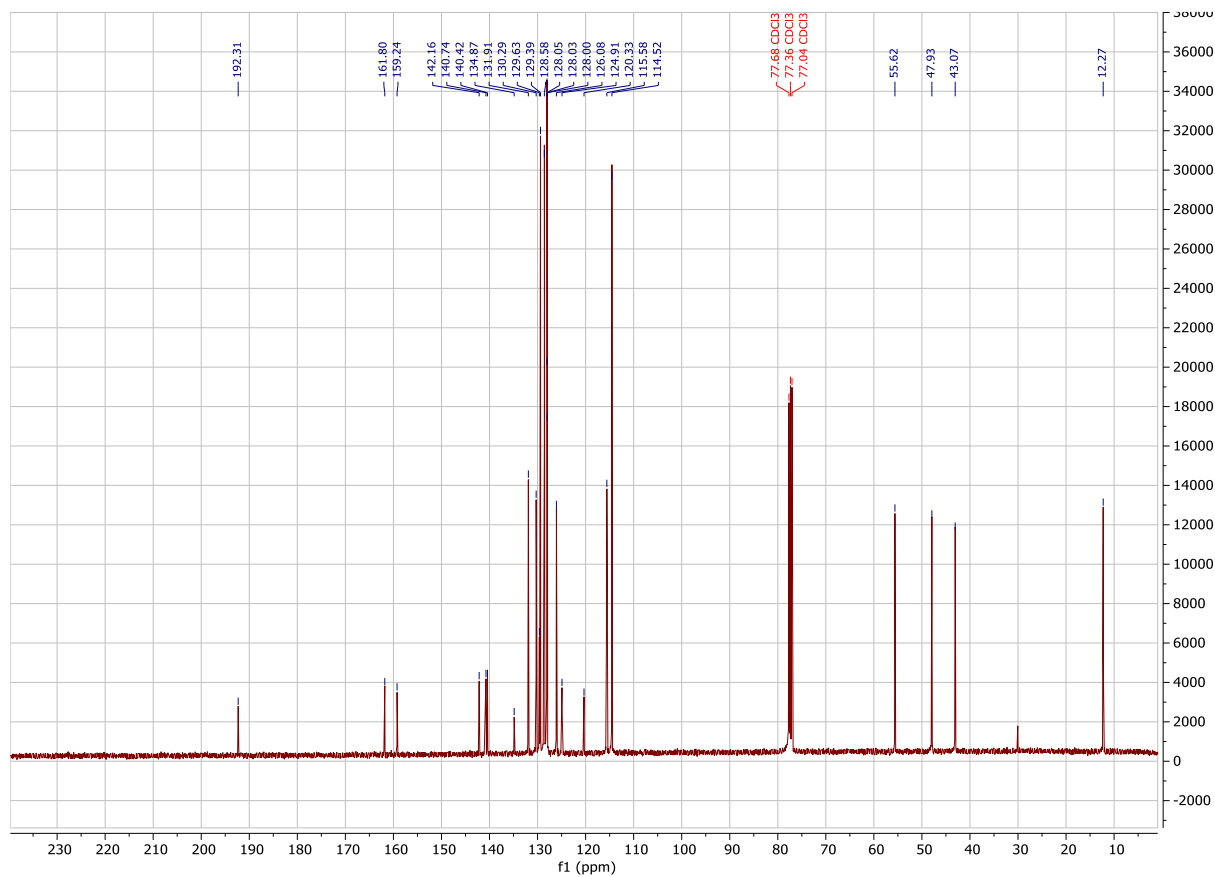

<sup>1</sup>H NMR (300 MHz, CDCl<sub>3</sub>) and <sup>13</sup>C NMR (75 MHz, CDCl<sub>3</sub>) of compound **9b**

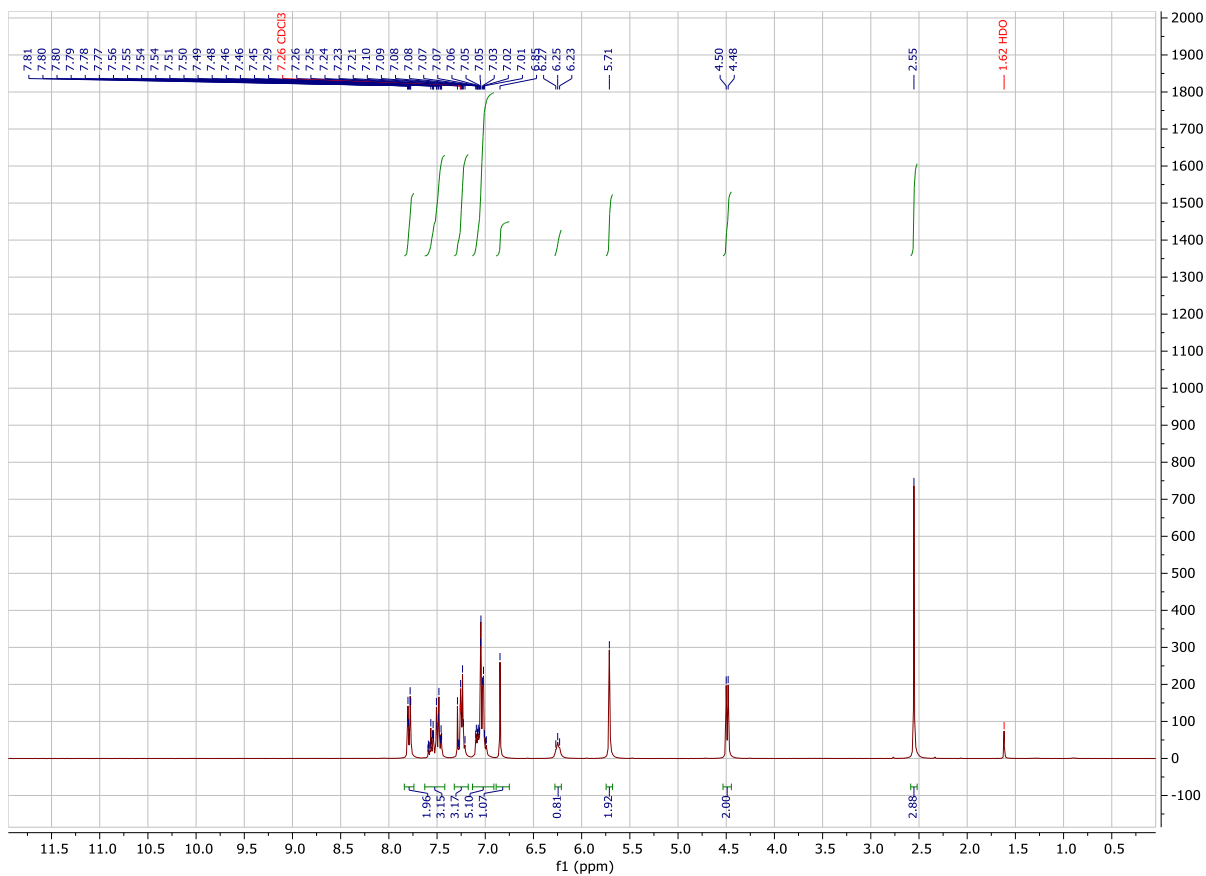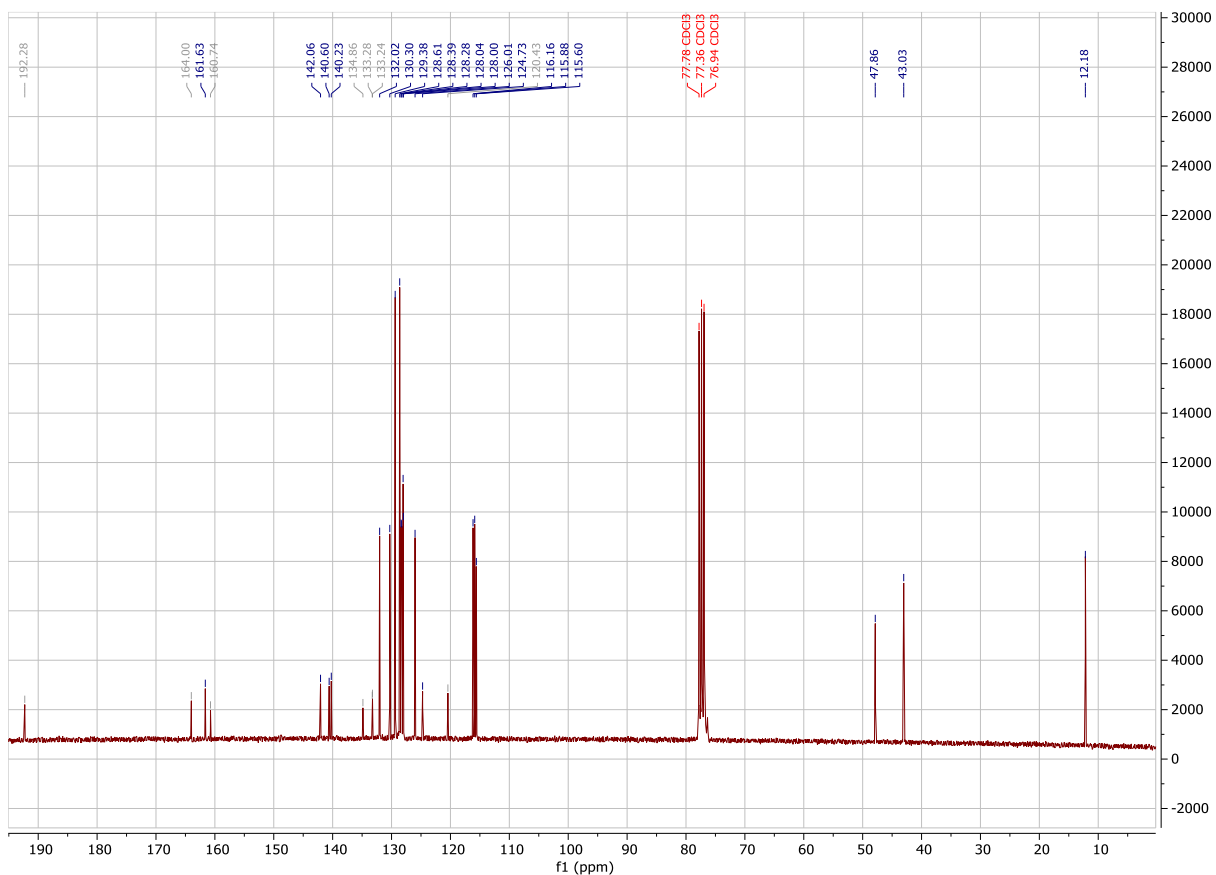

<sup>1</sup>H NMR (300 MHz, CDCl<sub>3</sub>) and <sup>13</sup>C NMR (75 MHz, CDCl<sub>3</sub>) of compound **9c**



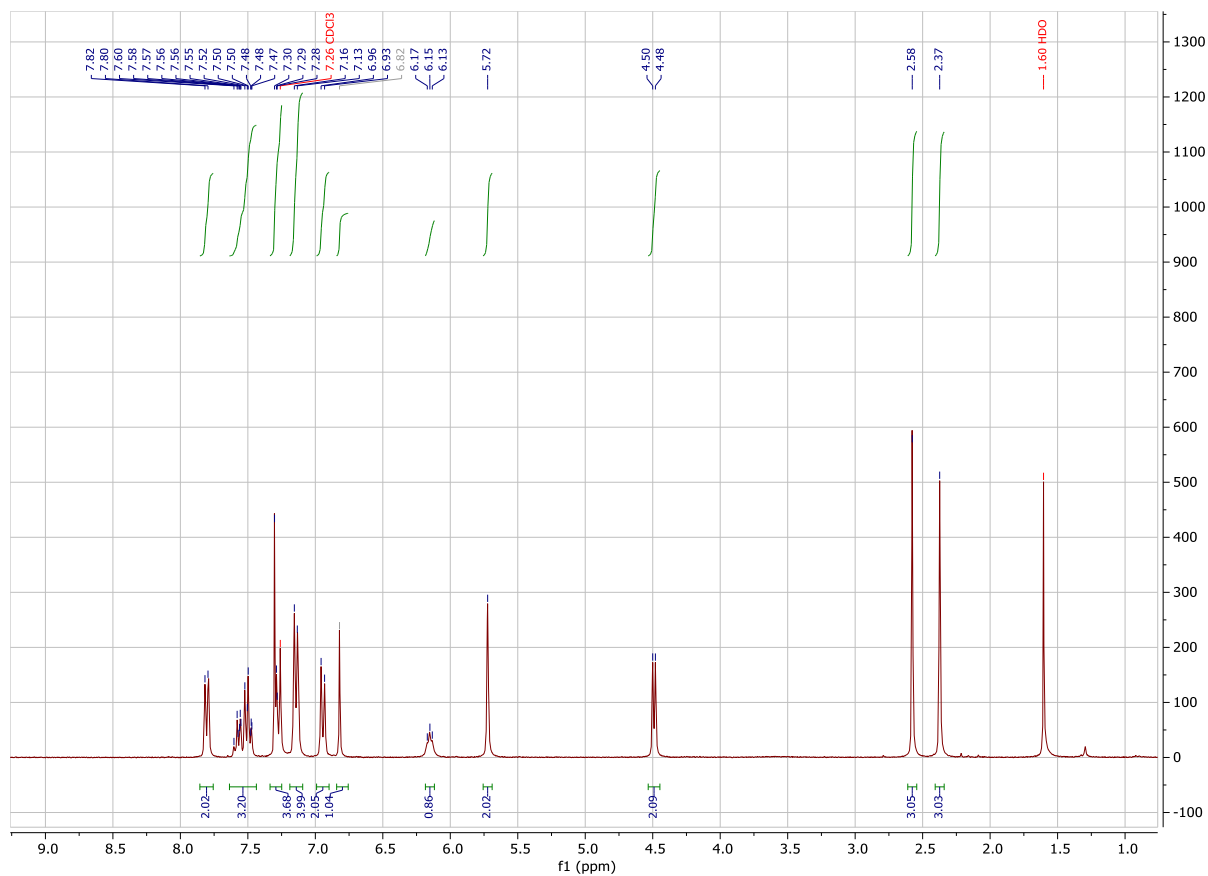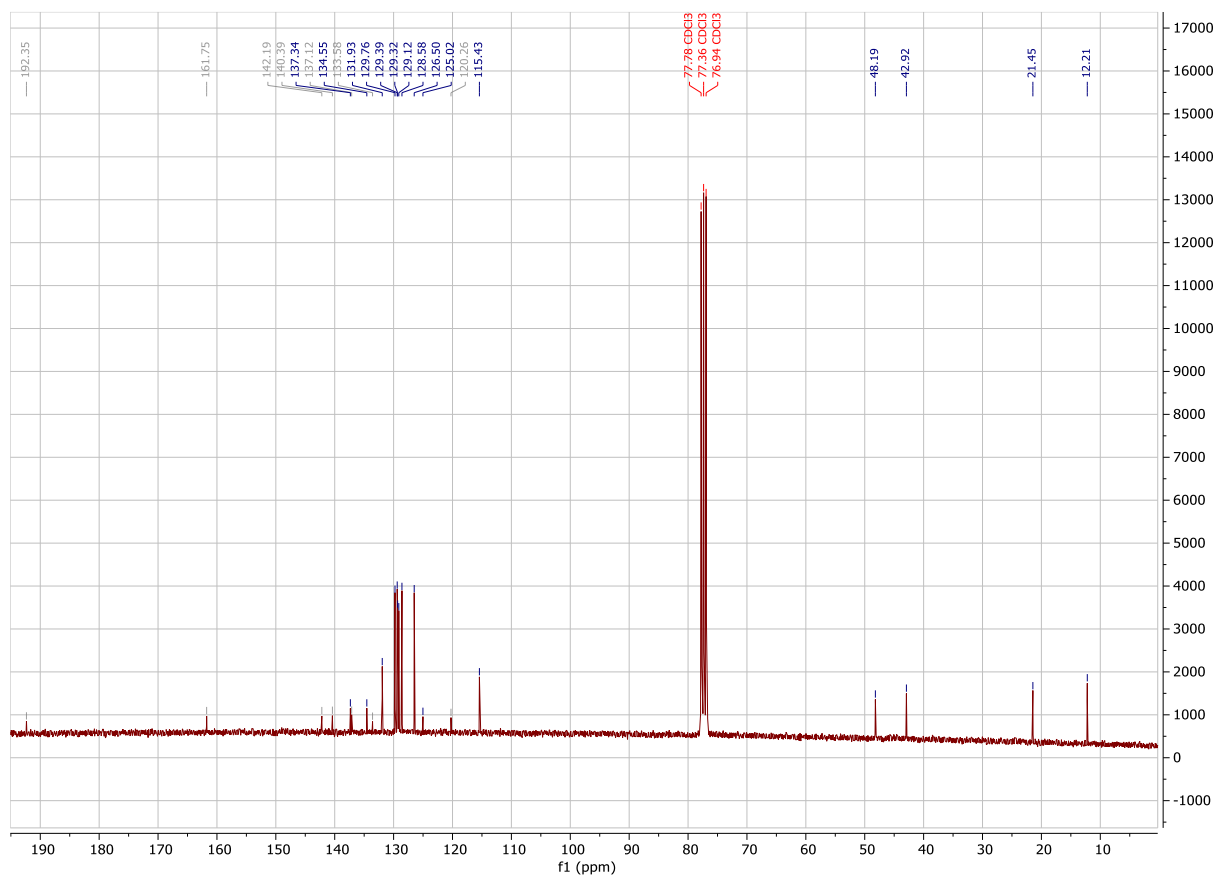

<sup>1</sup>H NMR (300 MHz, CDCl<sub>3</sub>) and <sup>13</sup>C NMR (75 MHz, CDCl<sub>3</sub>) of compound **9d**

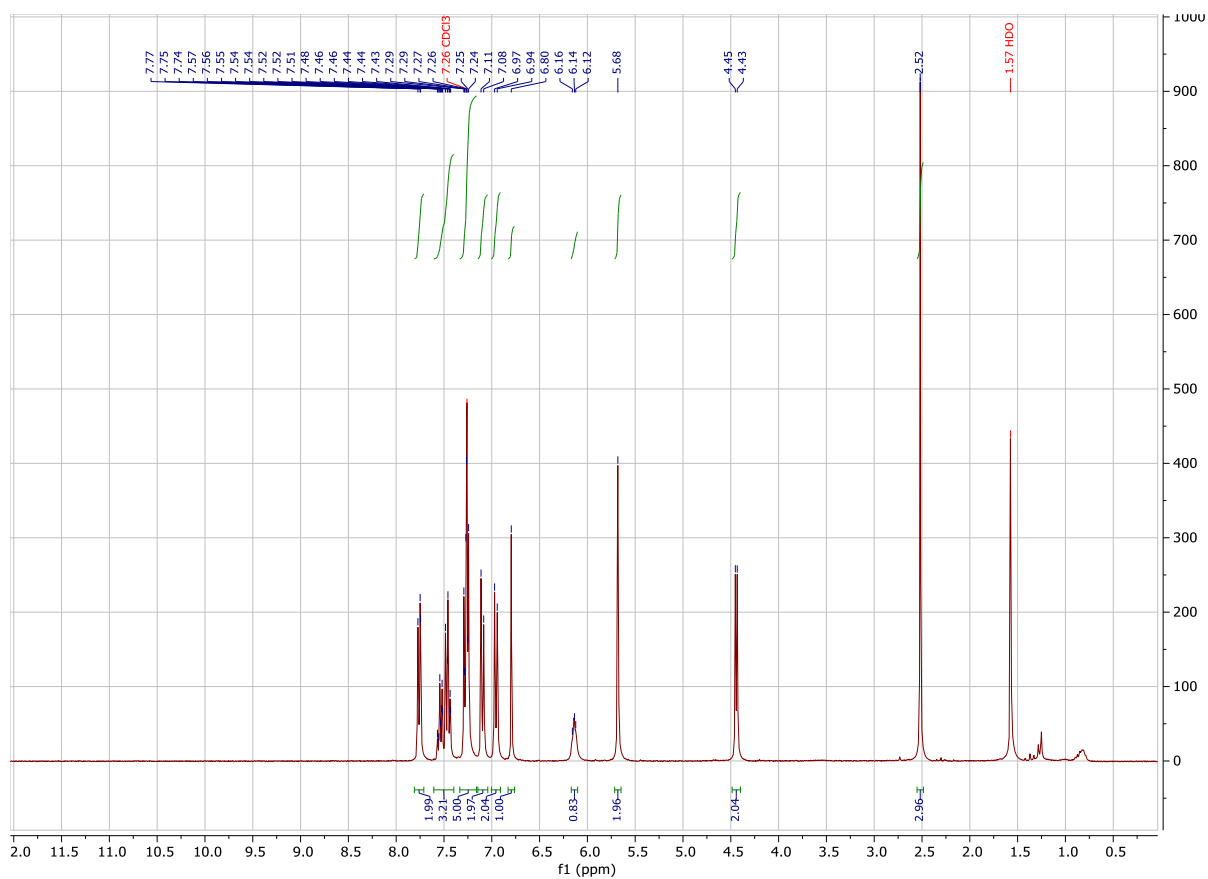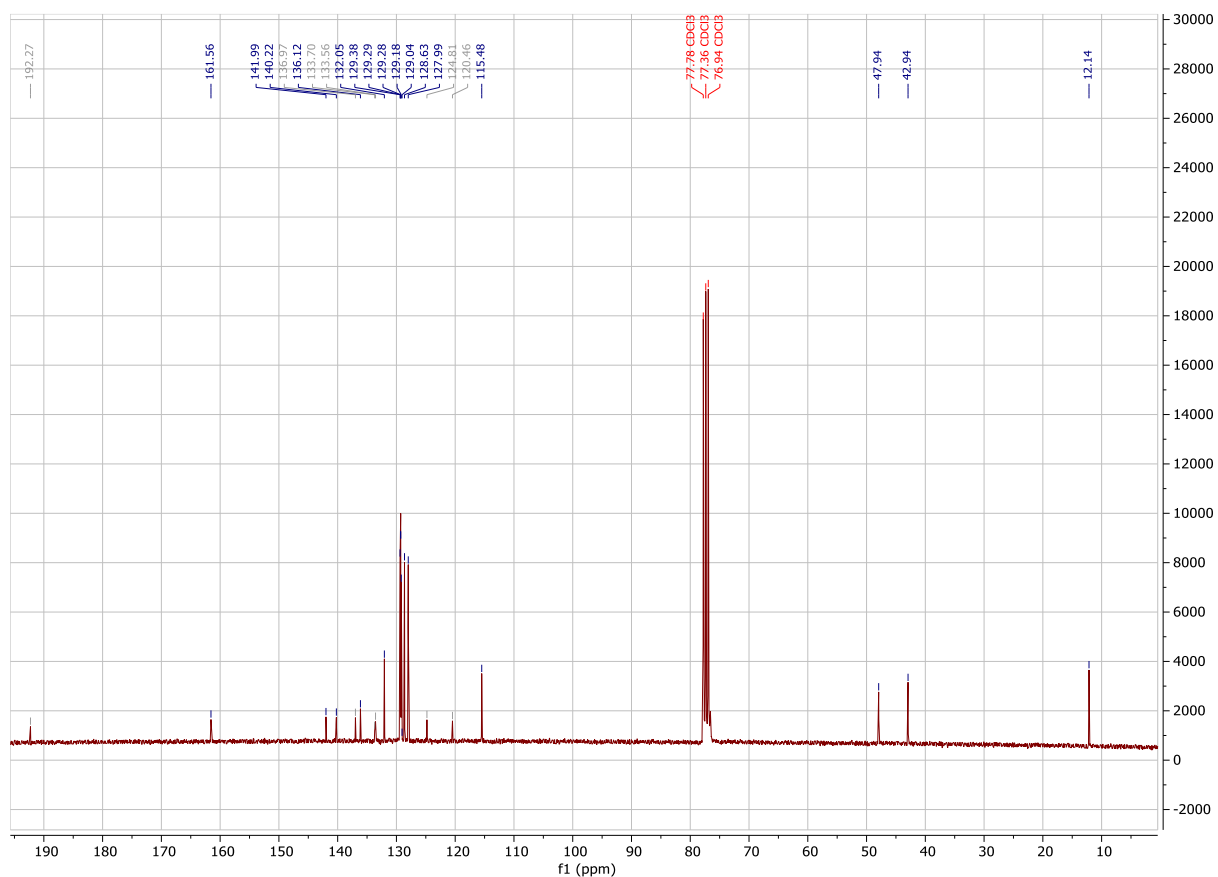

<sup>1</sup>H NMR (300 MHz, CDCl<sub>3</sub>) and <sup>13</sup>C NMR (75 MHz, CDCl<sub>3</sub>) of compound **9e**



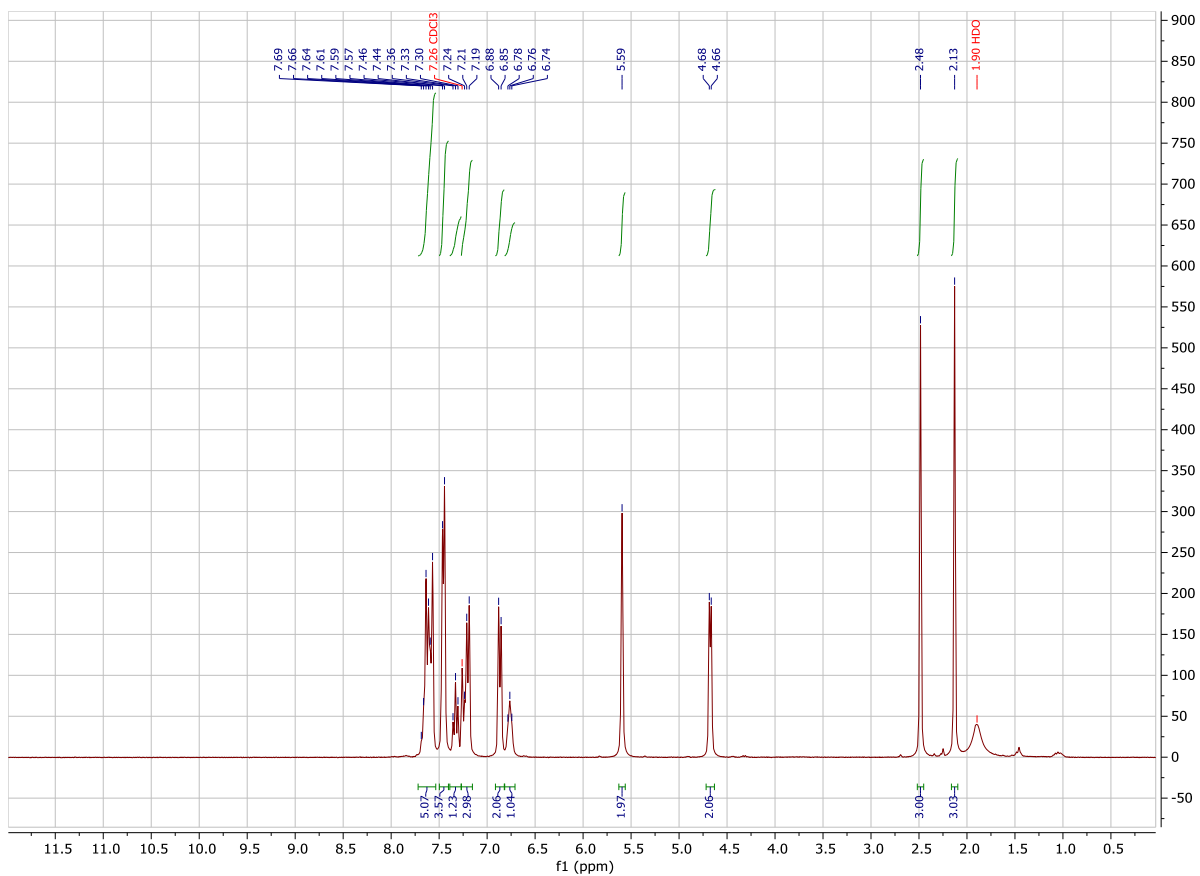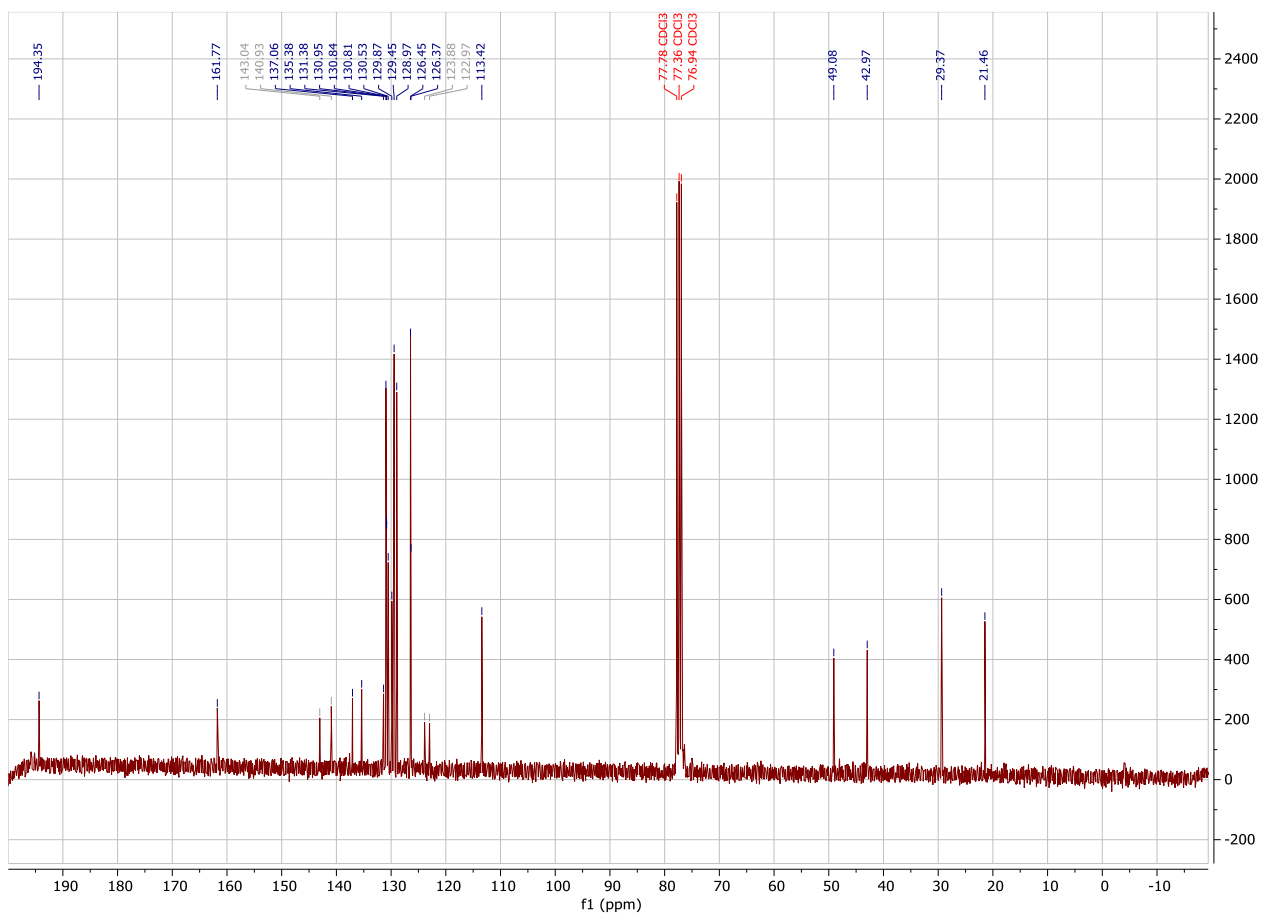

<sup>1</sup>H NMR (300 MHz, CDCl<sub>3</sub>) and <sup>13</sup>C NMR (75 MHz, CDCl<sub>3</sub>) of compound **9g**

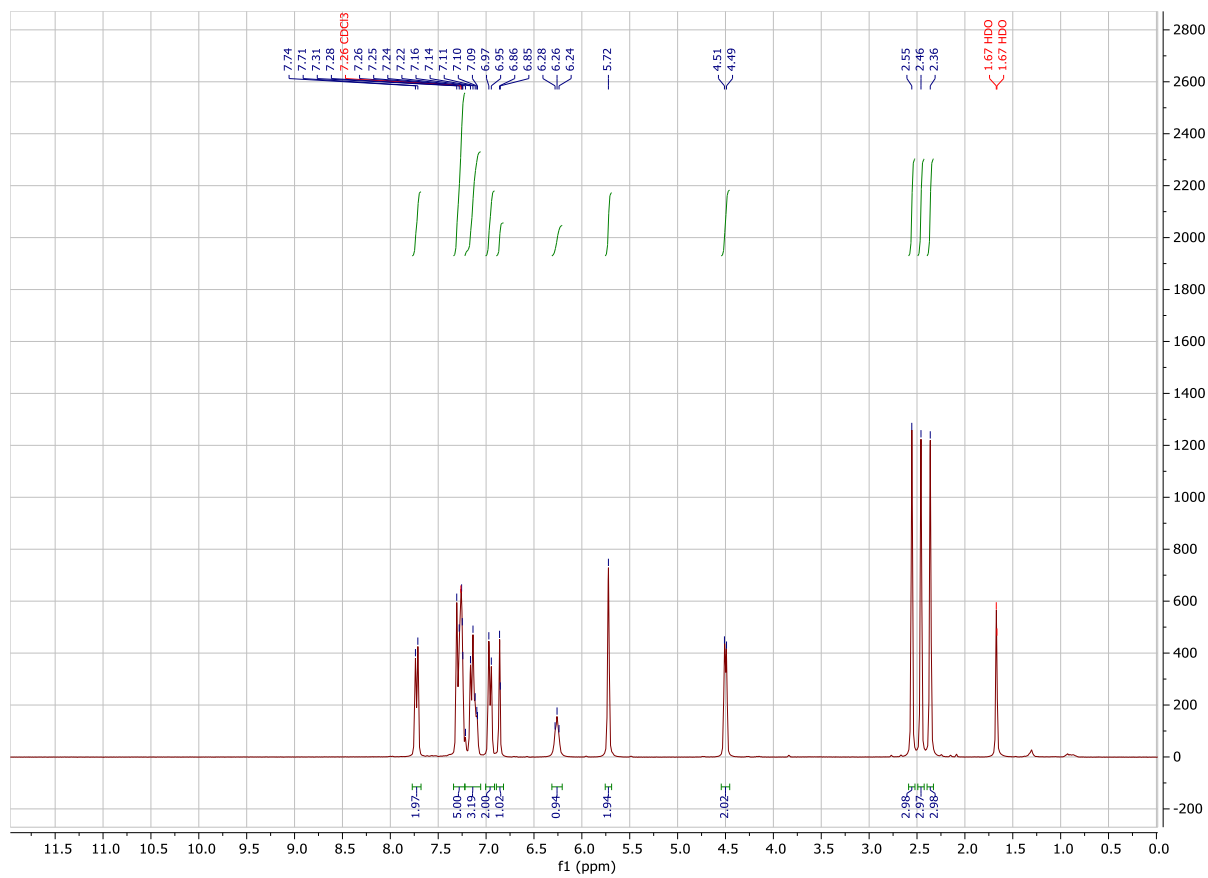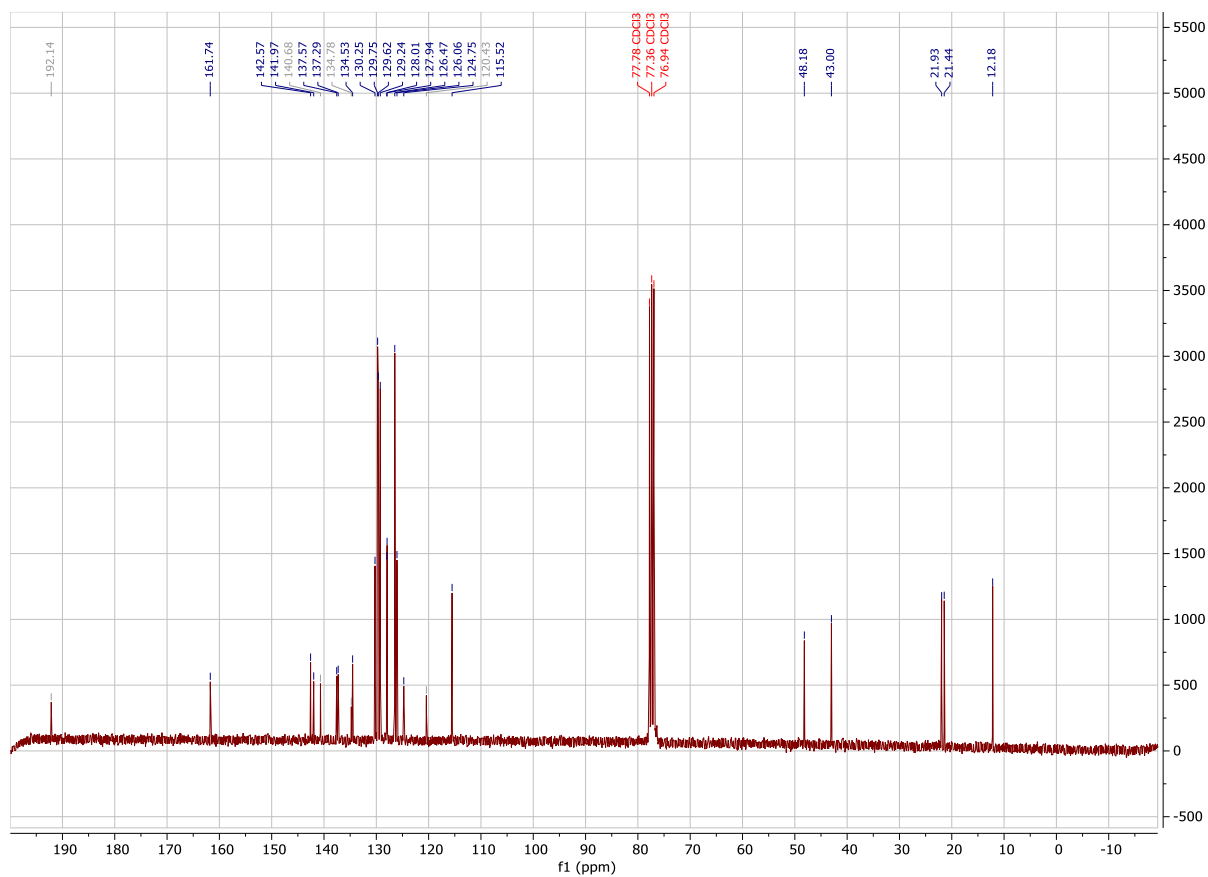

<sup>1</sup>H NMR (300 MHz, CDCl<sub>3</sub>) and <sup>13</sup>C NMR (75 MHz, CDCl<sub>3</sub>) of compound **9h**

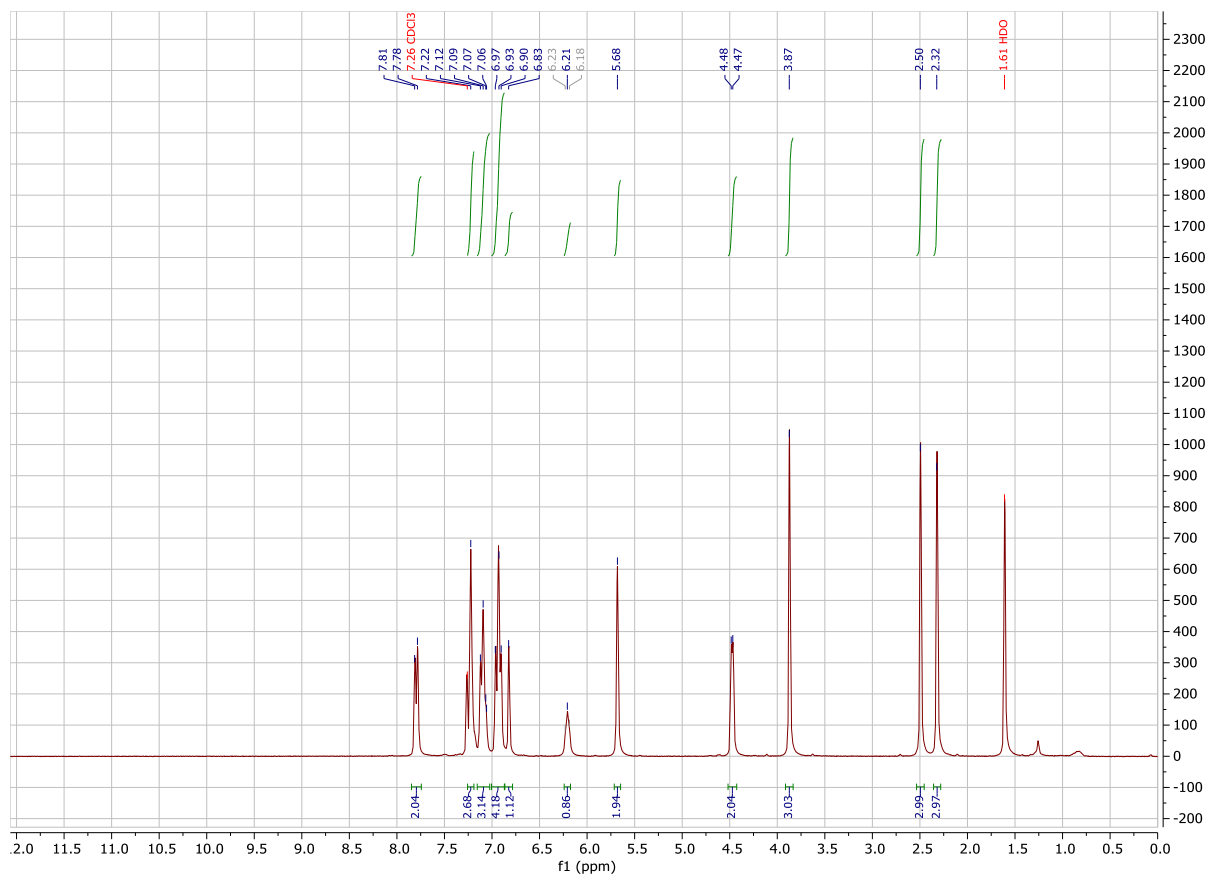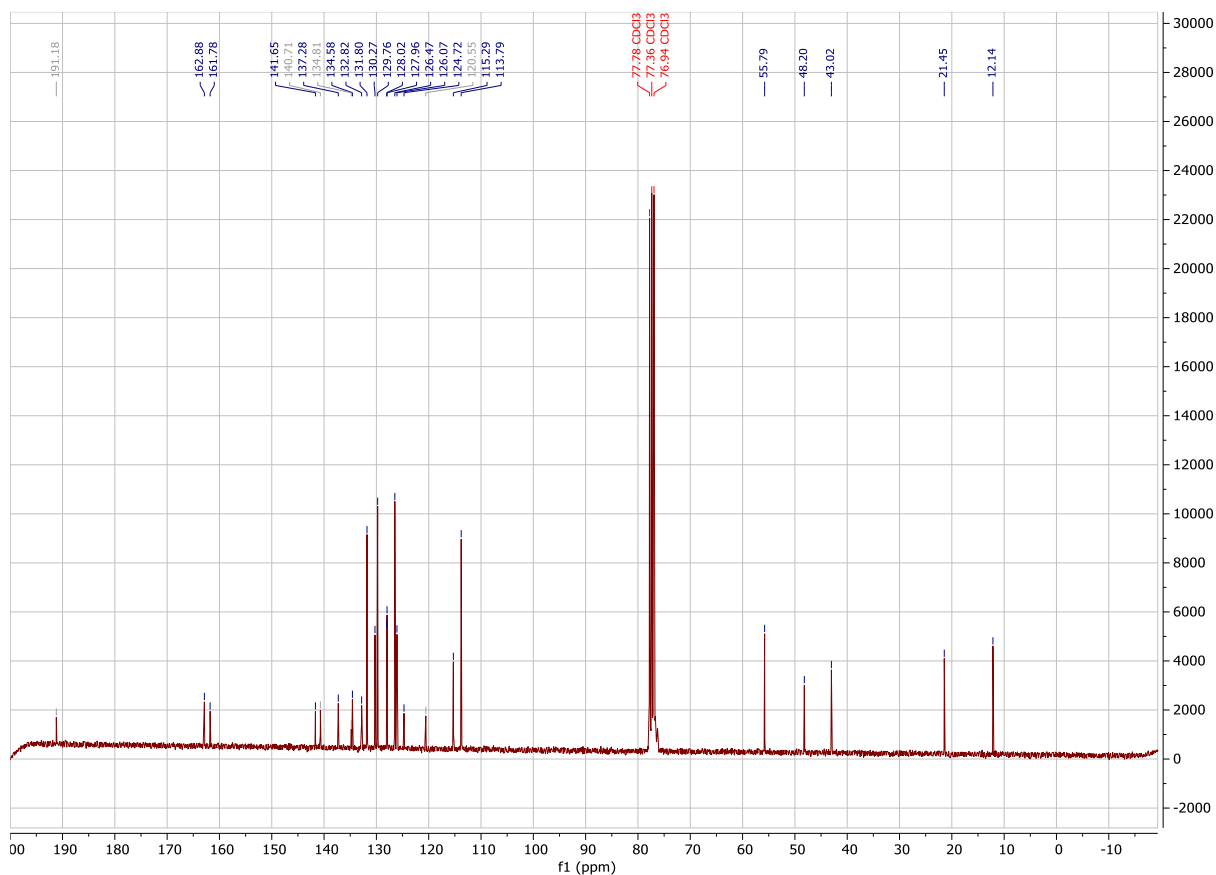

<sup>1</sup>H NMR (300 MHz, CDCl<sub>3</sub>) and <sup>13</sup>C NMR (75 MHz, CDCl<sub>3</sub>) of compound **9i**

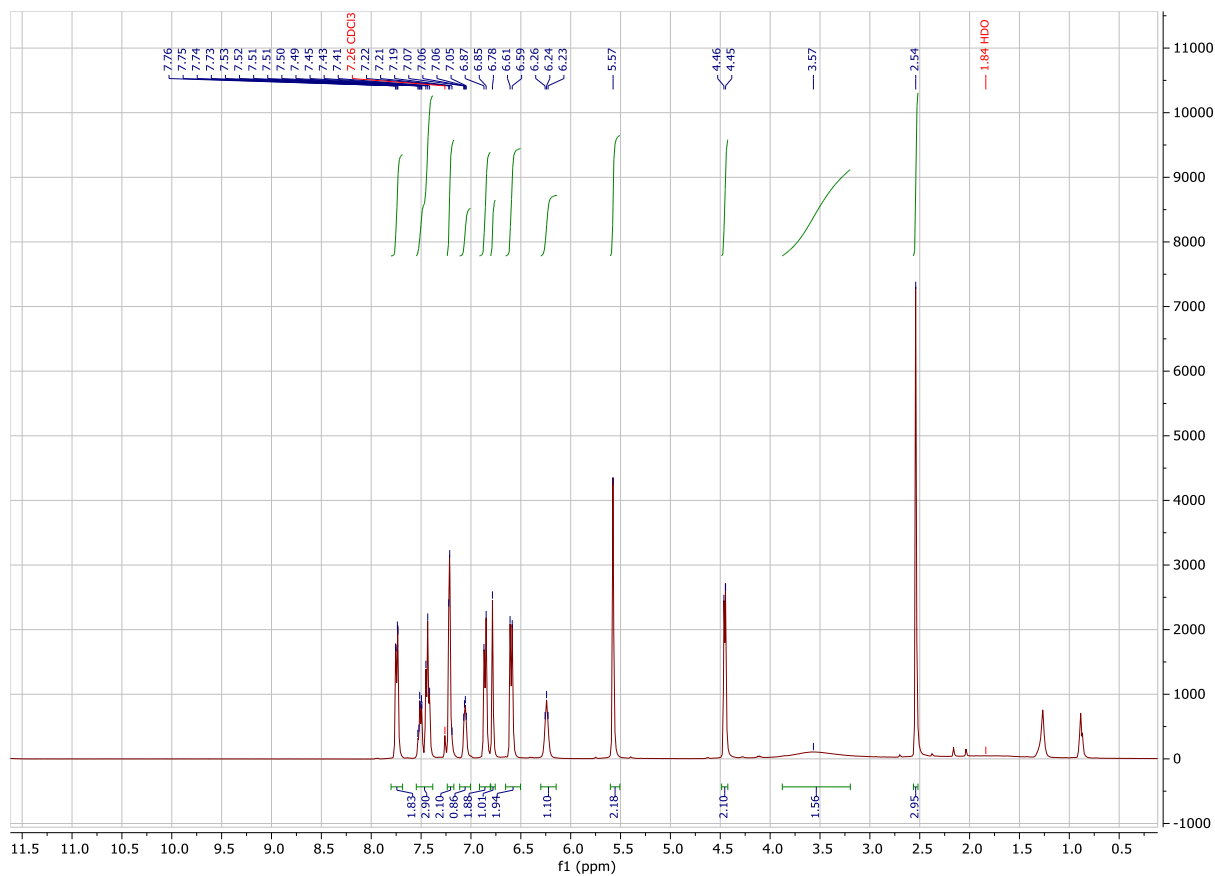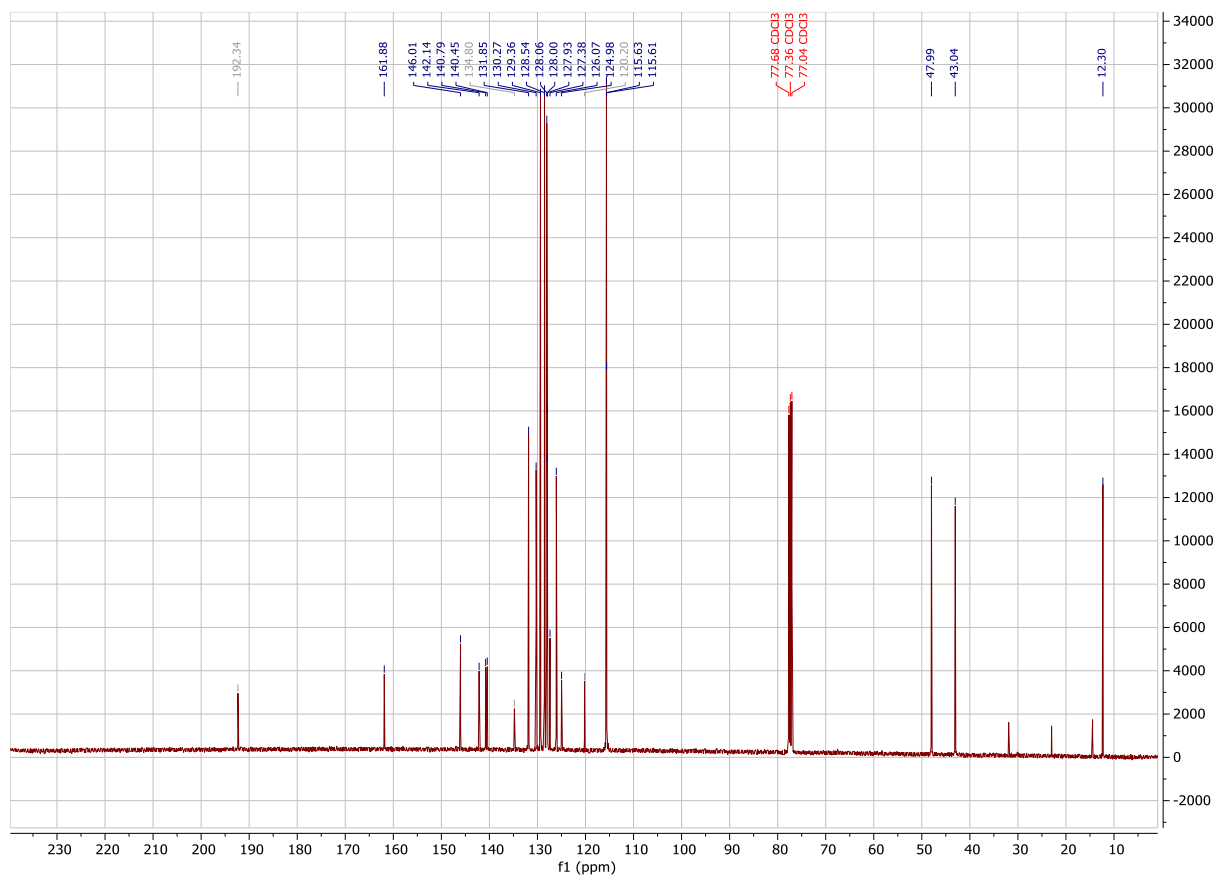

<sup>1</sup>H NMR (400 MHz, CDCl<sub>3</sub>) and <sup>13</sup>C NMR (101 MHz, CDCl<sub>3</sub>) of compound **10a**

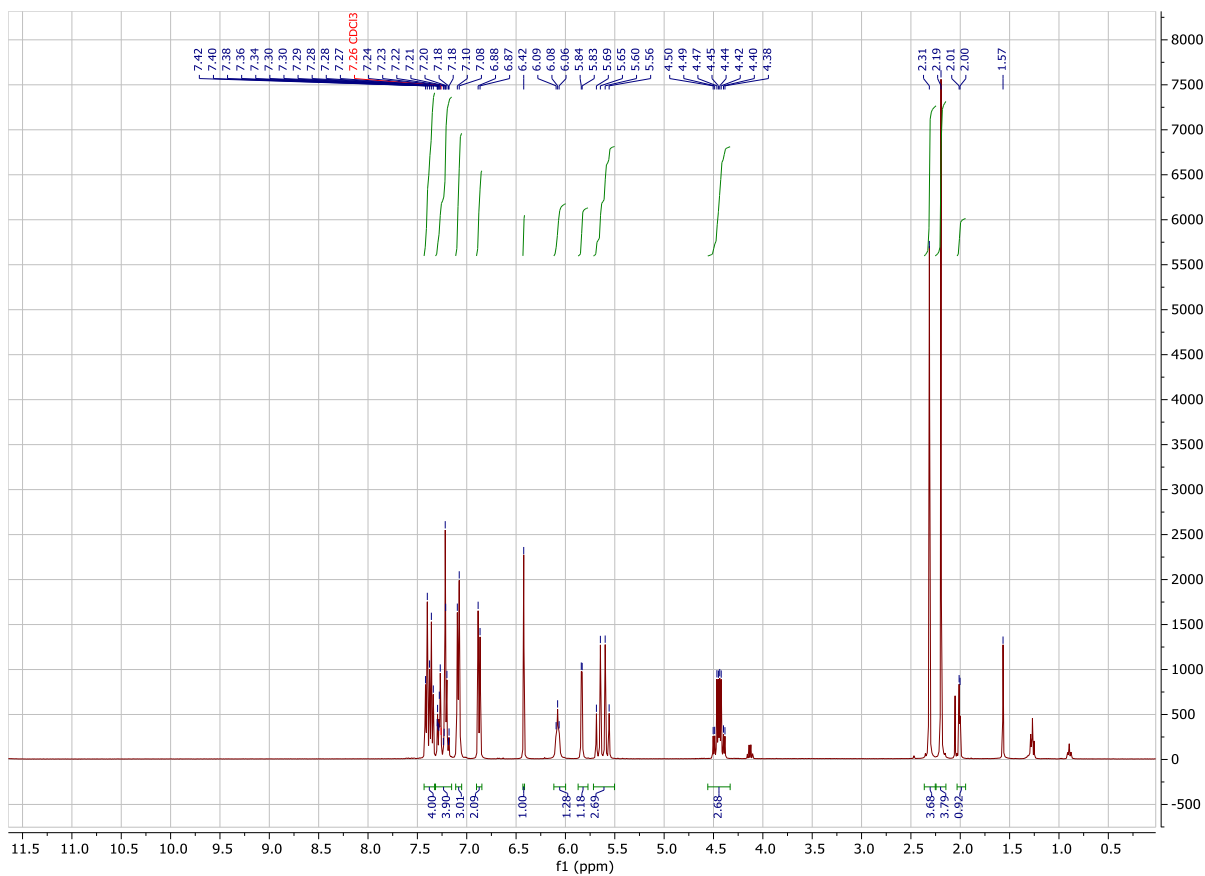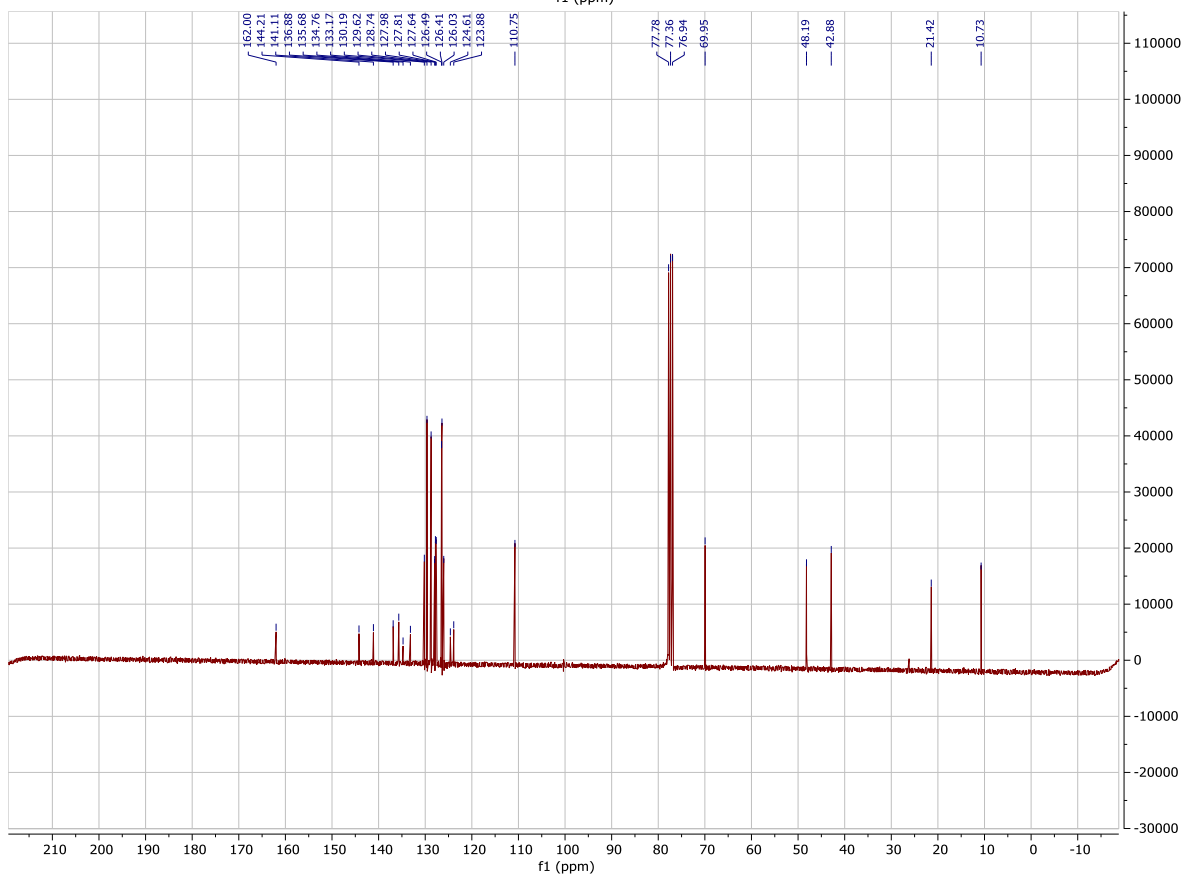

<sup>1</sup>H NMR (400 MHz, CDCl<sub>3</sub>) and <sup>13</sup>C NMR (101 MHz, CDCl<sub>3</sub>) of compound **10b**
